# Supplementary material
Source: ML conference proceedings conference paper supplement (https://openreview.net/forum?id=cANkPsVtsw)
Supplement: supplementary_material [file attachment]

## 400 APPENDIX

### 401 A Review Checkmarks

#### 402 A.1 Broader Impacts

403 We proposed a causal discovery algorithm that can systematically leverage low-degree conditional  
404 independences. The proposed method will enable causal discovery in settings where dataset sizes are  
405 systemically small, such as healthcare. We do not foresee misuse of the proposed algorithm beyond  
406 potential misuses of learning causal relations in general.

#### 407 A.2 Limitations

408 A limitation of the method is that it assumes all independence statements up to degree  $k$  can be tested  
409 for some  $k$ . In some cases, the set of available, or the set of reliable CI statements might not have  
410 such a structure. Our method is not directly applicable in such scenarios. Another limitation is that  
411 we assume that we can run CI tests for the tests that are deemed reliable. This is a non-trivial problem  
412 when the data is non IID, such as time-series data. We also make some other usual assumptions that  
413 are commonly made in causal discovery, such as acyclicity.

#### 414 A.3 Theory

415 We provide proofs of every claim, lemma and theorem in Section [B](#).

#### 416 A.4 Experiments

417 Experimental details are explained both in the main paper and in Section [F](#).

#### 418 A.5 Training Details

419 The proposed algorithm relies on conditional independence tests. We use  $\chi$ -square test for discrete  
420 variables, and Fisher-z test for continuous variables.

#### 421 A.6 Error Bars

422 We do not provide error bars. However, 100 graphs, and 3 datasets generated per the filled-out causal  
423 Bayesian network is sufficient to provide stable results. After re-running our experiments, we have  
424 not seen significant changes to the results.

#### 425 A.7 Compute

426 We run all our simulations on a MacBook Pro with 2.3 GHz 8-Core Intel Core i9 processor. Most  
427 simulations took less than 20 minutes to complete.

#### 428 A.8 Reproducibility

429 We are providing the implementation of  $k$ -PC and the code to obtain results which compare with PC.  
430 We will make all code public after acceptance.

#### 431 A.9 Licenses

432 We use only synthetic dataset and Asia dataset. The latter dataset [\[8\]](#), to the best of our knowledge,  
433 does not have licensing restrictions.

## B Proofs

In this section, we provide proofs for the lemmas and theorems in the paper. We also present FCI orientation rules for completeness, demonstrate why  $k$ -PC is incomplete, and give two sample runs of the  $k$ -PC algorithm. Each subsection starts from a new page to clearly separate the proofs of different lemmas/theorems.

### B.1 Proof of Lemma 3.6

We will crucially use the following three lemmas to prove our main results. We say a collider  $\langle u, v, w \rangle$  is closed, or blocks the path in context if no node in  $De(v)$  is in the conditioning set. Similarly, a path is called closed if it is not d-connecting, and open otherwise.

**Lemma B.1.** *Consider a DAG where  $X \notin An(Y)$ . Suppose there is a d-connecting path  $p$  between  $X, Y$  given  $T$  that starts with an arrow out of  $X$ .*

1. *There is at least one collider along  $p$ .*
2. *Let  $K$  be the collider closest to  $X$  on  $p$ . Then conditioning on  $T' = T - De(K)$  instead of  $T$  does not introduce new d-connecting paths that start with an arrowhead at  $X$ .*

*Proof.* 1. Any path that starts with  $X \rightarrow \dots$  must either be directed, or there must be at least one collider along the path. Since the path is between  $X, Y$  and  $X \notin An(Y)$ , it must be that the path has at least one collider on it.

2. First note that without loss of generality,  $p$  has the following form for some integer  $m \geq 0$  ( $m = 0$  means  $X \rightarrow K$ ):

$$X \rightarrow U_1 \rightarrow U_2 \dots \rightarrow U_m \rightarrow K \leftarrow \dots Y. \quad (2)$$

Suppose for the sake of contradiction that conditioned on  $T'$  there is a new d-connecting path  $q$  that starts with an arrowhead into  $X$ .  $q$  was clearly closed conditioned on  $T$  and become open by us removing nodes from the conditioning set  $T$ . This can only happen if we removed some node from  $T$  that is a non-collider along  $q$ . Consider the non-collider we removed that was closest to  $X$ , call this  $M$ . Thus, we have the path  $q$  that looks like this:

$$X \leftarrow W \dots M \dots Y, \quad (3)$$

for some  $W$ , where  $M$  is a non-collider on this path and is in  $De(K)$ .

We observe that the subpath between  $M$  and  $X$  cannot be directed from  $M$  to  $X$ . Because this would create the following cycle:

$$M \rightarrow \dots \rightarrow X \rightarrow U_1 \dots U_m \rightarrow K \rightarrow \dots \rightarrow M. \quad (4)$$

Thus a closer look at the path  $q$  reveals the following structure for some integer  $m'$  and node  $V$ :

$$X \leftarrow W_1 \leftarrow W_2 \dots \leftarrow W_{m'} \rightarrow V \dots M \dots Y \quad (5)$$

We will consider the following two cases: The edge adjacent to  $M$  along the subpath between  $W_{m'}$  and  $M$  is a tail or an arrowhead.

**Suppose the edge adjacent to  $M$  along the subpath between  $W_{m'}$  and  $M$  is a tail:** This means there is at least one collider between  $W_{m'}$  and  $M$ . Any such collider must be active since  $q$  is active given  $T'$ . Consider the collider that is closest to  $M$ . Since it is active, this collider must be an ancestor of  $T'$ . However, observe that  $K$  is an ancestor of this collider which implies that  $K$  is an ancestor of  $T'$  as well. However, we obtained  $T'$  by removing all descendants of  $K$  from  $T$ , which is a contradiction.

**This establishes that the edge adjacent to  $M$  along the subpath between  $W_{m'}$  and  $M$  is an arrowhead.** Thus, this reveals the following structure for  $q$ :

$$X \leftarrow W_1 \leftarrow W_2 \dots \leftarrow W_{m'} \rightarrow \dots \rightarrow M \dots Y \quad (6)$$

Suppose the directed path from  $K$  to  $M$  is as follows:

$$K \rightarrow \theta_1 \rightarrow \dots \theta_{m''} \rightarrow M \quad (7)$$

Recall that  $M$  is a non-collider along  $q$ . Thus the subpath of  $q$  between  $M$  and  $Y$  must start with a tail as  $M \rightarrow \dots Y$ . Now observe that if the subpath of  $q$  between  $M$  and  $Y$  had no collider, then we would have the following directed path from  $X$  to  $Y$ :

$$X \rightarrow U_1 \rightarrow U_m \rightarrow K \rightarrow \theta_1 \rightarrow \dots \rightarrow \theta_{m''} \rightarrow M \rightarrow \dots Y \quad (8)$$

However, we know  $X$  is a non-ancestor of  $Y$ . Thus, there must be at least one collider between  $M$  and  $Y$  along  $p$ , all of which are open given  $T'$ . Consider the collider that is closest to  $M$ . There is a directed path from  $M$  to this collider, and a directed path from this collider to a member of  $T'$  since it is open conditioned on  $T'$ . But this means there is a directed path from  $K$  to a member of  $T'$  since there is a directed path from  $K$  to this collider. This is a contradiction since we obtained  $T'$  by removing all descendants of  $K$  from  $T$ .

This establishes the claim that removing descendants of the collider along any d-connecting path that starts with a tail at  $X$  cannot introduce a d-connecting path that starts with an arrow into  $X$  when  $X \notin An(Y)$ .  $\square$

**Lemma B.2.** Consider a DAG  $D$  where  $X \notin An(Y)$  and  $Y \notin An(X)$ ,  $X, Y$  are non-adjacent and  $k$ -covered. Then conditioned on any subset  $T : |T| \leq k$ , there exists a d-connecting path between  $X, Y$  that has an arrowhead at both  $X$  and  $Y$ .

*Proof.* For the sake of contradiction suppose, conditioned on  $c$ , there is no d-connecting path with an arrow into  $X$  and an arrow into  $Y$ . Since neither  $X$  is an ancestor of  $Y$  nor  $Y$  is an ancestor of  $X$ , it must be that all d-connecting paths have colliders on them. And all such colliders must be ancestors of  $T$ .

Consider such a path  $p$  where the edge adjacent to  $X$  has a tail at  $X$ . Let  $K$  be the collider that is closest to  $X$ .

Thus we have

$$X \rightarrow U_1 \rightarrow \dots \rightarrow U_m \rightarrow K \leftarrow V \dots Y$$

for some  $\{U_i\}_{i \in m}, V$ . Since the path is open it must be that  $K \in An(T)$ . Let  $T' = T - De(K)$ , where  $De(K)$  are all descendants of  $K$ . Clearly,  $q$  is no longer open conditioned on  $T'$ . We investigate other open paths now, keeping in mind that  $X, Y$  being  $k$ -covered implies that  $X \not\perp\!\!\!\perp Y | T'$  since  $|T'| \leq |T| \leq k$ .

**Claim 1:** Removing the descendants of the collider closest to  $X$  from the conditioning set can only add d-connecting paths that start with a tail at  $X$  but no d-connecting paths that start with an arrowhead at  $X$ .

*Proof of Claim 1:* Since  $X$  is not an ancestor of  $Y$ , by Lemma B.1, we know that removing the descendants of  $K$  from  $T$  can only introduce d-connecting paths that are out of  $X$ .  $\square$

Now consider the d-connecting paths under conditioning on  $T'$ . We know that these paths must have a tail either at  $X$  or at  $Y$  since we started with such d-connecting paths by assumption and by Claim 1, removing  $De(K)$  from  $T$  can only introduce new d-connecting paths that have tails at  $X$ . Using the fact that no path that has an arrowhead into both endpoints are opened, we can use recursion and claim that we can make  $X, Y$  d-separated by removing descendants of colliders (that are closest to the endpoint that is adjacent to a tail) of active paths, which gives the following:

**Claim 2:** There exists a set  $T^*$  of size at most  $k$  such that  $X \perp\!\!\!\perp Y | T^*$ , which leads to a contradiction since  $X, Y$  are  $k$ -covered by assumption.

*Proof of Claim 2:* Given claim 1, we can continue removing descendants of the colliders of the active paths that are closest to the tail-end node from the set  $T$ . Either no d-connecting path is left at some point in this process, or that we end up removing all the variables from the conditioning set. If the former, this is a contradiction since  $X, Y$  are  $k$ -covered. If the latter, then this is another contradiction due to the following: This means that given empty set, paths that have a tail adjacent to one of the endpoints, i.e., the paths with colliders on them (since all paths that have a tail adjacent to one of the endpoints must have a collider because  $X \notin An(Y)$  and  $Y \notin An(X)$ ) are d-connecting, which is not possible. This proves Claim 2.  $\square$

Due to the symmetry between  $X, Y$ , the supposition that the only d-connecting paths must have a tail adjacent to either endpoint must be wrong, which proves the lemma.  $\square$

522 **Lemma B.3.** Consider a DAG  $D$  where  $X \notin \text{An}(Y)$ ,  $X, Y$  are non-adjacent and  $k$ -covered. Then  
 523 conditioned on any subset  $T : |T| \leq k$ , there exists a  $d$ -connecting path between  $X, Y$  that starts  
 524 with an arrow into  $X$ .

525 *Proof.* For the sake of contradiction, suppose otherwise. Given  $T$ , all the  $d$ -connecting paths start  
 526 with a tail at  $X$ . We will show that we can find some  $T'$  of size at most  $k$  that  $d$ -separates  $X, Y$ ,  
 527 which lead to a contradiction since  $X, Y$  are assumed to be  $k$ -covered.

528 Consider any path  $q$  that is  $d$ -connecting given  $T$  which starts with a tail at  $X$ . Since  $X \notin \text{An}(Y)$ ,  
 529 by Lemma B.1 it must be that this path has at least one collider on it. Let  $K$  be the collider that is  
 530 closest to  $X$ . Thus we have

$$X \rightarrow U_1 \rightarrow \dots \rightarrow U_m \rightarrow K \leftarrow V \dots Y$$

531 for some  $\{U_i\}_i, V$ . Since the path is open, this collider cannot be blocking the path  $q$ . It must be  
 532 that  $K \in \text{An}(T)$ . Let  $T' = T - \text{De}(K)$ , where  $\text{De}(K)$  are all descendants of  $K$ . Clearly,  $q$  is no  
 533 longer open conditioned on  $T'$ . We investigate other open paths now, keeping in mind that  $X, Y$   
 534 being  $k$ -covered implies that  $X \not\perp\!\!\!\perp Y | T'$  since  $|T'| \leq |T| \leq k$ .

535 **Claim 1:** Removing the descendants of the collider closest to  $X$  from the conditioning set can only  
 536 add  $d$ -connecting paths that start with a tail at  $X$  but no  $d$ -connecting paths that start with an  
 537 arrowhead at  $X$ .

538 *Proof of Claim 1:* Since  $X$  is not an ancestor of  $Y$ , by Lemma B.1 we know that removing the  
 539 descendants of  $K$  from  $T$  can only introduce  $d$ -connecting paths that are out of  $X$ .  $\square$

540 Now consider the  $d$ -connecting paths under conditioning on  $T'$ . We know that these paths must  
 541 have a tail at  $X$  since we started with only such  $d$ -connecting paths by assumption and by Claim 1,  
 542 removing  $\text{De}(K)$  from  $T$  can only introduce  $d$ -connecting paths that have tails at  $X$ . Using the fact  
 543 that no path that has an arrowhead into  $X$ , we can use recursion and claim that we can make  $X, Y$   
 544  $d$ -separated by removing descendants of colliders (that are closest to  $X$ ) of active paths, which gives  
 545 the following:

546 **Claim 2:** There exists a set  $T^*$  of size at most  $k$  such that  $X \perp\!\!\!\perp Y | T^*$ , which leads to a contradiction  
 547 since  $X, Y$  are  $k$ -covered by assumption.

548 *Proof of Claim 2:* Given claim 1, we can continue removing descendants of the first colliders of  
 549 active paths that are closest to  $X$  from the set  $T$ . Either, no  $d$ -connecting path is left at some point in  
 550 this process or that we end up removing all the variables from the conditioning set. If the former, this  
 551 is a contradiction since  $X, Y$  are  $k$ -covered. If the latter, then this is another contradiction due to the  
 552 following: This means that given empty set, paths that start with a tail and have colliders on them (as  
 553 they cannot be directed and collider-free since  $X$  is not an ancestor of  $Y$ ) are  $d$ -connecting, which is  
 554 not possible. This proves Claim 2.  $\square$

555 Therefore, the supposition that all the  $d$ -connecting paths must have a tail adjacent to  $X$  must be  
 556 wrong, which proves the lemma.  $\square$

557 The above lemmas will be crucial in proving Lemma 3.6. Now consider a  $d$ -connecting path between  
 558  $x, z$  given  $c$  and a  $d$ -connecting path between  $z, y$  given  $c$ . We have the following lemma:

559 **Lemma B.4.** Let  $p$  be an active path between  $x, z$  given  $c$ , and  $q$  be an active path between  $z, y$  given  
 560  $c$ , where  $x, y, z \notin c$ . If  $x$  and  $y$  are  $d$ -separated given  $c$ , then

- 561 1. Paths  $p, q$  must have no overlapping nodes and
- 562 2.  $Y$  must be a collider along the concatenated path and  $Y \notin \text{An}(c)$ .

563 *Proof.* We would like to allow the possibility that these paths might go through the same nodes. To  
 564 address this, it helps to consider walks.

565 **Definition B.5.** A walk on a DAG is any sequence of edges.

566 **Definition B.6.** A path on a DAG is a sequence of edges where each node appears at most once.

There is a direct relation between active walks and d-connecting paths [6]. Indeed, this relation is leveraged to efficiently check dependence using paths, rather than having to search over all walks, which is a much larger space.

**Definition B.7.** A walk between two nodes  $a, b$  is called active given  $c$  if each collider along the walk is in  $c$  and each non-collider is not in  $c$ .

**Definition B.8.** A path between two nodes  $a, b$  is called open given  $c$  if each collider along the path is in  $An(c)$  and each non-collider is not in  $c$ .

Consider an active walk where a node  $t$  appears multiple times. Observe that  $t$  must appear with the same collider status, since otherwise the walk would not be active. If the appearance is of the form

$$a \dots \xrightarrow{\alpha} t \rightarrow \dots \leftarrow t \xleftarrow{\beta} \dots b, \quad (9)$$

then there must be a collider that is in  $c$  between the two appearances of  $t$ 's. We can skip the intermediate subpath between the two appearances of  $t$ 's to obtain the walk

$$a \dots \xrightarrow{\alpha} t \xleftarrow{\beta} \dots b, \quad (10)$$

Since there is at least one collider that is in  $c$  along the skipped subpath, we have that  $t \in An(c)$ . Therefore,  $t$  will not be blocking the path that is obtained after repeatedly applying this and other shortening steps. If the appearances is of the form:

$$a \dots \xrightarrow{\alpha} t \rightarrow \dots \rightarrow t \xrightarrow{\beta} \dots b, \quad (11)$$

we can similarly skip the subpath between the two appearances of  $t$ 's to obtain the shorter walk

$$a \dots \xrightarrow{\alpha} t \xrightarrow{\beta} \dots b, \quad (12)$$

and repeat this process until  $t$  is not repeated. The resulting walk/path is still open since  $t$  will appear in the same collider status, namely as a non-collider and if it was not blocking the walk, it will not be blocking the path either. This argument holds for any configuration where  $t$  is a non-collider. If the appearances is of the form:

$$a \dots \xrightarrow{\alpha} t \leftarrow \dots \rightarrow t \xleftarrow{\beta} \dots b, \quad (13)$$

then it must be that  $t \in c$ , and thus the walk obtained by skipping the subwalk between the two appearances of  $t$ 's, i.e.,

$$a \dots \xrightarrow{\alpha} t \xleftarrow{\beta} \dots b, \quad (14)$$

must be d-connecting.

This shows that each active walk corresponds to a d-connecting path and vice versa. Now we can proceed with the proof of the lemma:

1. Suppose  $p, q$  have overlapping nodes. Let  $w_p$  be the walk that corresponds to  $p$  and  $w_q$  be the walk that corresponds to  $q$ . Consider the concatenated walk  $w = w_p, w_q$ . If any repeated node has different collider status along  $w$ , then the path is not active. But this means that that node was blocking either  $w_p$  or  $w_q$ , which would be a contradiction. Therefore, repeated nodes cannot have different collider status along  $w$ .

Suppose a node  $t$  is repeated in  $w_p$  and  $w_q$  and has the same collider status. In this case, consider the walk obtained by concatenating the sub-walk of  $w_p$  between  $x$  and  $t$ , with the sub-walk of  $w_q$  from  $t$  to  $y$ . By repeating this process for any repeated node, we can obtain a path that corresponds to this walk, which would always be active since the repeated nodes have the same collider status along this path that they had in  $w_p$  or  $w_q$  and were not blocking these walks. Therefore, they cannot block the concatenated path obtained this way either, which is a contradiction since we are given that  $x, y$  are d-separated given  $c$ . Therefore if any node is repeated in  $w_p$  and  $w_q$  then the concatenated walk is always active. Thus, it must be the case that there is no repeated nodes.

2. Since there is no repeated nodes from 1., we can operate at the path level instead of considering walks. Suppose  $Y$  is not a collider. Since  $Y \notin c$ , it would be d-connecting and thus the concatenating path would be d-connecting, a contradiction. Suppose  $Y$  is a collider but  $Y \in An(c)$ . In this case,  $Y$  would not block the concatenated path either, which is a contradiction. This establishes the result.  $\square$

608 The next lemma shows that colliders that are closed in  $D$  must remain closed in the  $k$ -closure  $\mathcal{C}_k(D)$ .  
 609 **Lemma B.9.** *If a collider is blocked in  $D$  conditioned on some  $c : |c| \leq k$  then it must also be*  
 610 *blocked in  $\mathcal{C}_k(D)$  conditioned on  $c$ .*

611 *Proof.* Suppose  $(X \rightarrow Z \leftarrow Y)_D$  is a collider that is blocked given  $c$ . Thus, it must be that  
 612  $Z \notin \text{An}(c)$  in  $D$ . For the sake of contradiction, suppose that this collider is unblocked in  $\mathcal{C}_k(D)$ .  
 613 Thus, it must be the case that  $Z \in \text{An}(c)$  in  $\mathcal{C}_k(D)$ . This means there is a new directed path from  $Z$   
 614 to  $c$  in  $\mathcal{C}_k(D)$ . If this path existed in  $D$ , the collider would be unblocked, which is a contradiction.  
 615 Thus, at least one of the edges along this path must have been added during the construction of  $\mathcal{C}_k(D)$ .  
 616 Consider the collection of edges on this path that do not exist in  $D$ . Note that by construction of  
 617  $\mathcal{C}_k(D)$ , a directed edge  $\alpha \rightarrow \beta$  is added between a  $k$ -covered pair  $\alpha, \beta$  only if there is a directed path  
 618 from  $\alpha$  to  $\beta$ . Consider the path obtained by replacing the directed edge between any  $k$ -covered pair  
 619 along this path with the corresponding directed path in  $D$ . The resulting directed path must be in  
 620  $D$ . This shows that there was at least one path already in  $D$  that implied  $Z \in \text{An}(c)$ , which is a  
 621 contradiction. Therefore, any collider in  $p$  that is unblocked in  $\mathcal{C}_k(D)$  must also be unblocked in  
 622  $D$ .  $\square$

623 **Lemma B.10.** *The set of ancestors of any set  $c$  of nodes in  $\mathcal{C}_k(D)$  are identical to the set of ancestors*  
 624 *of  $c$  in  $\mathcal{C}_k(D)$ .*

625 *Proof.* Adding edges to a graph, directed or bidirected, cannot decrease the set of ancestors of any  
 626 node. We only need to show that the set of ancestors in  $\mathcal{C}_k(D)$  is not larger than the set of ancestors  
 627 in  $D$ .

628 Suppose otherwise: A node  $a \in \text{An}(c)$  in  $\mathcal{C}_k(D)$  but  $a \notin \text{An}(c)$  in  $D$ . This can only happen if a  
 629 collection of edges added during the construction of  $\mathcal{C}_k(D)$  render  $a$  an ancestor of  $c$ . However, each  
 630 such edge is added only if there is a directed path between its endpoints in  $D$ . Consider the path  
 631 obtained by replacing each such added edge along the path that renders  $a$  an ancestor of  $c$  in  $\mathcal{C}_k(D)$   
 632 with the corresponding directed paths in  $D$ . This directed path must be in  $D$ , which means that  $a$  was  
 633 an ancestor of  $c$  in  $D$  as well, which is a contradiction.  $\square$

634 We are finally ready for the proof of Lemma 3.6.

635 **Proof of Lemma 3.6:**

636 Since no edge is removed during the construction of the  $k$ -closure, one direction immediately follows:  
 637 If  $a \perp\!\!\!\perp b|c$  in  $\mathcal{C}_k(D)$ , then  $a \perp\!\!\!\perp b|c$  in  $D$ . The implication is clearly true for any set  $c$  of size at most  
 638  $k$  as well. Therefore we only need to show the other direction.

639 Suppose  $a \perp\!\!\!\perp b|c$  in  $D$  where  $|c| \leq k$ . We will show that  $a \perp\!\!\!\perp b|c$  in  $\mathcal{C}_k(D)$ . For the sake of  
 640 contradiction, suppose otherwise. Then there must be a d-connecting path  $p$  between  $a, b$  given  $c$  in  
 641  $\mathcal{C}_k(D)$ . The length of any such path must be greater than 1 since otherwise, whether this edge already  
 642 existed in  $D$  or it was added during the construction of  $\mathcal{C}_k(D)$ ,  $a, b$  must have been dependent given  
 643  $c$  in  $D$ , which is a contradiction. Since the orientation of the existing edges in  $D$  did not change in  
 644  $\mathcal{C}_k(D)$ , either this path did not exist in  $D$  or that it existed but it was blocked by some collider that  
 645 is not in  $\text{An}(c)$  in  $D$ . The latter is not possible due to Lemma B.9, since any unblocked collider in  
 646  $\mathcal{C}_k(D)$  must also be unblocked in  $D$ . Thus, it must be that this d-connecting path did not exist in  $D$ .

647 **Suppose  $p$  does not exist in  $D$ .** At least one edge must have been added to form this path in  $\mathcal{C}_k(D)$   
 648 during the construction of  $\mathcal{C}_k(D)$ .

649 For any added edge  $u \rightarrow v$ , the following is true: Since  $u \rightarrow v$  was added in  $\mathcal{C}_k(D)$ , it must be the  
 650 case that  $v \notin \text{An}(u)$  since otherwise there would be a cycle. By Lemma B.3, conditioned on  $c$ , there  
 651 exists a d-connecting path between  $u, v$  where the edge adjacent to  $v$  is into  $v$ . For any added edge  
 652  $u \leftrightarrow v$ , the following is true: Since  $u \leftrightarrow v$  was added in  $\mathcal{C}_k(D)$ , it must be the case that  $u \notin \text{An}(v)$   
 653 and  $v \notin \text{An}(u)$ . By Lemma B.2, conditioned on  $c$ , there exists a d-connecting path between  $u, v$   
 654 where the edge adjacent to  $u$  is into  $u$  and the edge adjacent to  $v$  is into  $v$ . Call any such path implied  
 655 by these lemmas a *replacement path*. Note that a replacement path might be directed or not.

656 Consider a path  $q$  in  $D$  that is obtained from  $p$  by switching the edges added during the construction  
 657 of  $\mathcal{C}_k(D)$  with the replacement paths using the following policy: Suppose  $u \rightarrow v$  in  $\mathcal{C}_k(D)$  for some  
 658  $k$ -covered pair  $u, v$ . If a directed path is open given  $c$  in  $D$ , use that path as the replacement path



659 for the edge  $a \rightarrow b$ . If not, use any other path. This means that either the path that replaces an edge  
 660  $u \rightarrow v$  is directed or that both the endpoints have an arrowhead and that  $u \in An(c)$ .

661 Observe that each replacement path is d-connecting and the subpaths of  $p$  that remain intact in  $q$   
 662 must be d-connecting since  $p$  is d-connecting. By Lemma B.4, any two paths – whether it is a pair  
 663 of replacement paths or a replacement path and a subpath of  $p$  – have overlapping nodes, then their  
 664 concatenation must be d-connecting. Since we assumed that  $q$  was not d-connecting, it must be that  
 665 one of the endpoints of one of the added edges must be blocking  $q$ . We investigate each such node to  
 666 verify that  $q$  is indeed d-connecting to arrive at a contradiction.

667 In other words, the collider status of some of these nodes must have changed due to replacing some  
 668 edges with replacement paths. Specifically due to Lemma B.4, one of the endpoints of replacement  
 669 paths must be a collider and not an ancestor of  $c$ . Since ancestrality status cannot change from  $D$  to  
 670  $\mathcal{C}_k(D)$  due to Lemma B.10, the only way for  $q$  to not be d-connecting is if some node that is not an  
 671 ancestor of  $c$  changes status from being a non-collider along  $p$  to being a collider along  $q$ .

672 Note that for an edge  $u \leftrightarrow v$ , the nodes  $u$  and  $v$  are adjacent to an arrowhead in the replacement path.  
 673 Thus, if some node  $t$  changes collider status in  $q$  compared to  $p$ , it cannot be due to bidirected edges  
 674 along  $p$ .

675 Now consider the directed edges  $u \rightarrow v$ . If the replacement path is directed from  $u$  to  $v$ , similarly  $u$   
 676 is adjacent to a tail and  $v$  is adjacent to an arrowhead on the replacement path. Therefore, such edges  
 677 cannot alter the collider status of nodes at the junction of different paths. Finally consider the directed  
 678 edges  $u \rightarrow v$  where  $u$  and  $v$  are both adjacent to an arrowhead on the replacement path. Observe that  
 679 this edge cannot change the collider status of  $v$ . We now focus on  $u$ . If the other edge adjacent to  $u$   
 680 along  $q$  is a tail,  $u$  remains a non-collider and cannot block  $q$ . Now suppose the other edge adjacent  
 681 to  $u$  along  $q$  is an arrowhead. This makes  $u$  a collider in  $q$  whereas  $u$  was a non-collider along  $p$  since  
 682 we had  $u \rightarrow v$  along  $p$ . However, by construction of  $q$ , as we ended up adding a path with arrowheads  
 683 at both endpoints, it must be that the directed path between  $u, v$  (which exists since  $u \rightarrow v$  was added  
 684 during the construction of  $\mathcal{C}_k(D)$ ) must be blocked via conditioning. This means  $u \in An(c)$  which  
 685 means that although the status of  $u$  changes from non-collider to collider, it must be that this collider  
 686 does not block  $q$  since it is an ancestor of  $c$ . Therefore, no replacement path can alter the status of a  
 687 node to block the path  $q$ , and  $q$  must be d-connecting, which contradicts with the assumption that the  
 688 path was not d-connecting in  $D$ .

689 This establishes that any d-connecting path in  $\mathcal{C}_k(D)$  is also d-connecting in  $D$ , which establishes  
 690 that if  $a \not\perp\!\!\!\perp b | c$  in  $\mathcal{C}_k(D)$ , then  $a \not\perp\!\!\!\perp b | c$  in  $D$ . This establishes the lemma.

## 691 B.2 Proof of Lemma 3.8

692 For a mixed graph to be a maximal ancestral graph, we need to show that it does not have directed or  
 693 almost directed cycles and that any non-adjacent pair of nodes can be made conditionally independent  
 694 by conditioning on some subset of observed variables [21]. We first define almost directed cycle, and  
 695 propose a lemma that shows that  $k$ -closure graphs do not have directed or almost directed cycles.

696 **Definition B.11** ([21]). A directed path  $p$  from  $a$  to  $b$  and the edge  $a \leftrightarrow b$  is called an almost directed  
 697 cycle.

698 **Lemma B.12.** For any DAG  $D$ , and integer  $k$ ,  $\mathcal{C}_k(D)$  does not have directed or almost directed  
 699 cycles.

700 *Proof.* Suppose, for the sake of contradiction that there is a directed cycle in  $\mathcal{C}_k(D)$ . Since each  
 701 edge  $X \rightarrow Y$  in  $\mathcal{C}_k(D)$  either exists in  $D$  or for each such edge in  $\mathcal{C}_k(D)$ , there is a directed path  
 702 from  $X$  to  $Y$  in  $D$ , existence of a directed cycle in  $\mathcal{C}_k(D)$  would imply a directed cycle in  $D$ , which  
 703 contradicts with the DAG assumption of  $D$ .

704 Suppose, for the sake of contradiction that there is an almost directed cycle in  $\mathcal{C}_k(D)$ , i.e., we have a  
 705 directed path from  $a$  to  $b$  for two nodes  $a \leftrightarrow b$ . Since  $a \leftrightarrow b$  is added during construction of  $\mathcal{C}_k(D)$ , it  
 706 must be the case that neither  $a$  nor  $b$  are ancestors of each other. However, from the above argument,  
 707 there must be a directed path from  $a$  to  $b$  in  $D$ , which is a contradiction. Thus,  $\mathcal{C}_k(D)$  cannot have  
 708 almost directed cycles.  $\square$

709 The other condition for a mixed graph to be a maximal ancestral graph is that for any non-adjacent pair  
 710 of nodes, there exists a subset of the observed variables that make them conditionally independent. For  
 711 the  $k$ -closure graphs, this simply follows by construction: Any pair of nodes that are non-adjacent in  
 712  $\mathcal{C}_k(D)$  can be made conditionally independent given some set of size at most  $k$  in  $D$  by construction  
 713 of  $\mathcal{C}_k(D)$ . From Lemma 3.6 this conditional independence relation must be retained in  $\mathcal{C}_k(D)$ . Thus  
 714 any non-adjacent pair of nodes in  $\mathcal{C}_k(D)$  can be d-separated in  $\mathcal{C}_k(D)$  by some conditioning set of  
 715 size at most  $k$ . This establishes the claim.

716  $\square$



717 **B.3 Proof of Theorem 3.9**

718 Our main observation is that a parallel of Lemma B.2 works for MAGs with  $k$ -covered bidirected  
 719 edges. The following lemmas are for any mixed graph  $\mathbb{K}$  that satisfies the constraints in Theorem 3.9,  
 720 i.e., those that are MAGs and that satisfy the condition that for any bidirected edge  $a \leftrightarrow b$ ,  $a, b$  are  
 721  $k$ -covered in the graph  $\mathbb{K} - (a \leftrightarrow b)$ .

722 **Lemma B.13.** *Suppose  $X \notin An(Y)$ . Suppose there is a  $d$ -connecting path  $p$  between  $X, Y$  given  $T$*   
 723 *that starts with an arrow out of  $X$ .*

724 1. *There is at least one collider along  $p$ .*

725 2. *Let  $K$  be the collider closest to  $X$  on  $p$ . Then conditioning on  $T' = T - De(K)$  instead of*  
 726  *$T$  does not introduce new  $d$ -connecting paths that start with an arrowhead at  $X$ .*

727 *Proof.* 1. Any path that starts with  $X \rightarrow \dots$  must either be directed, or there must be at least one  
 728 collider along the path. Since the path is between  $X, Y$  and  $X \notin An(Y)$ , it must be that the path has  
 729 at least one collider on it.

730 2. First note that without loss of generality,  $p$  has the following form for some integer  $m \geq 0$  ( $m = 0$   
 731 means  $X \rightarrow K$ ):

$$X \rightarrow U_1 \rightarrow U_2 \dots \rightarrow U_m \rightarrow K \leftarrow^* \dots Y. \quad (15)$$

732  $*$  is a wildcard representing either an arrowhead or a tail.

733 Suppose for the sake of contradiction that conditioned on  $T'$ , there is a new  $d$ -connecting path  $q$   
 734 that starts with an arrowhead into  $X$ .  $q$  was clearly closed conditioned on  $T$  and became open by us  
 735 removing nodes from the conditioning set  $T$ . This can only happen if we removed some node from  $T$   
 736 that is a non-collider along  $q$ . Consider the non-collider we removed that was closest to  $X$ , call this  
 737  $M$ . Thus we have the path  $q$  that looks like this:

$$X \leftarrow^* W \dots M \dots Y, \quad (16)$$

738 where  $M$  is a non-collider on this path and is in  $De(K)$ .

739 We observe that the subpath between  $M$  and  $X$  cannot be directed from  $M$  to  $X$ . Because this would  
 740 create the following cycle, since  $K$  is assumed to be the first collider along  $p$ , and an ancestor of  $M$ .

$$M \rightarrow \dots \rightarrow X \rightarrow U_1 \dots U_m \rightarrow K \rightarrow \dots \rightarrow M. \quad (17)$$

741 Thus a closer look at the path  $q$  reveals the following structure for some integer  $m'$  and node  $V$ :

$$X \leftarrow W_1 \leftarrow W_2 \dots \leftarrow W_{m'} \leftarrow^* V \dots M \dots Y \quad (18)$$

742 We will consider the following two cases: The edge mark adjacent to  $M$  along the subpath between  
 743  $W_{m'}$  and  $M$  is a tail or an arrowhead.

744 **Suppose the edge mark adjacent to  $M$  along the subpath between  $W_{m'}$  and  $M$  is a tail:** This  
 745 means there is at least one collider between  $W_{m'}$  and  $M$ . Any such collider must be active since  $q$  is  
 746 active given  $T'$ . Consider the collider that is closest to  $M$ . Since it is active, this collider must be an  
 747 ancestor of  $T'$ . However, observe that  $K$  is an ancestor of this collider which implies that  $K$  is an  
 748 ancestor of  $T'$  as well. However, we obtained  $T'$  by removing all descendants of  $K$  from  $T$ , which is  
 749 a contradiction.

750 **This establishes that the edge mark adjacent to  $M$  along the subpath between  $W_{m'}$  and  $M$  is**  
 751 **an arrowhead.** Thus, this reveals the following structure for  $q$ :

$$X \leftarrow W_1 \leftarrow W_2 \dots \leftarrow W_{m'} \leftarrow^* \dots \leftarrow^* M \dots Y \quad (19)$$

752 Suppose the directed path from  $K$  to  $M$  is as follows for some  $\{\theta_i\}_i$  for some integer  $m''$ :

$$K \rightarrow \theta_1 \rightarrow \dots \theta_{m''} \rightarrow M \quad (20)$$

753 Recall that  $M$  is a non-collider along  $q$ . Thus, the subpath of  $q$  between  $M$  and  $Y$  must start with a  
 754 tail as  $M \rightarrow \dots Y$ . Now observe that if the subpath of  $p$  between  $M$  and  $Y$  had no collider, then we  
 755 would have the following directed path from  $X$  to  $Y$ :

$$X \rightarrow U_1 \rightarrow \dots \rightarrow U_m \rightarrow K \rightarrow \theta_1 \rightarrow \dots \theta_{m''} \rightarrow M \rightarrow \dots \rightarrow Y \quad (21)$$

756 However, we know  $X$  is a non-ancestor of  $Y$ . Thus, there must be at least one collider between  $M$   
 757 and  $Y$  along  $p$ , all of which are open given  $T'$ . Consider the collider that is closest to  $M$ . There is a  
 758 directed path from  $M$  to this collider, and a directed path from this collider to a member of  $T'$ . But  
 759 this means there is a directed path from  $K$  to a member of  $T'$  since there is a directed path from  $K$  to  
 760 this collider. This is a contradiction since we obtained  $T'$  by removing all descendants of  $K$  from  $T$ .

761 This establishes the claim that removing descendants of the collider along any d-connecting path that  
 762 starts with a tail at  $X$  cannot introduce a d-connecting path that starts with an arrow into  $X$  when  
 763  $X \notin An(Y)$ .  $\square$

764 The following is the parallel lemma to Lemma B.2 for any mixed graph  $\mathbb{K}$  that satisfies the conditions  
 765 of Theorem 3.9

766 **Lemma B.14.** *Consider a bidirected edge  $X \leftrightarrow Y$  in  $\mathbb{K}$ . Suppose conditioned on any subset  
 767  $T : |T| \leq k$ ,  $X \not\perp\!\!\!\perp Y | T$  in  $G - (X \leftrightarrow Y)$ . Then conditioned on any  $T : |T| \leq k$ , there exists a  
 768 d-connecting path between  $X, Y$  that starts with an arrow into  $X$  and an arrow into  $Y$ .*

769 *Proof.* For the sake of contradiction suppose, conditioned on some  $T : |T| \leq k$ , there is no d-  
 770 connecting path with an arrow into  $X$  and an arrow into  $Y$ . Since neither  $X$  is an ancestor of  $Y$  nor  
 771  $Y$  is an ancestor of  $X$ , all d-connecting paths must have colliders on them. And all such colliders  
 772 must be ancestors of  $T$ .

773 Consider such a path  $p$  where, without loss of generality, the edge adjacent to  $X$  has a tail at  $X$ . Let  
 774  $K$  be the collider that is closest to  $X$ .

775 Thus we have

$$X \rightarrow U_1 \rightarrow \dots \rightarrow U_m \rightarrow K \leftarrow^* V \dots Y \quad (22)$$

776 for some  $\{U_i\}_i, V$  and integer  $m$ . Since the path is open, this collider must be unblocked. It must be  
 777 that  $K \in An(T)$ . Let  $T' = T - De(K)$ , where  $De(K)$  are all descendants of  $K$ . Clearly,  $p$  is no  
 778 longer open. We investigate other open paths now, keeping in mind that  $X, Y$  are dependent given  $T'$   
 779 since  $|T'| \leq k$ .

780 **Claim 1:** Removing the descendants of the collider closest to  $X$  from the conditioning set can  
 781 only add d-connecting paths that start with a tail at  $X$  but no d-connecting path that starts with an  
 782 arrowhead at  $X$ .

783 *Proof of Claim 1:* Since a bidirected edge exists between  $X, Y$ , and that  $\mathbb{K}$  is a MAG, neither  $X$  nor  
 784  $Y$  are ancestors of one another, since then we would have an almost directed cycle. By Lemma B.13,  
 785 we know that removing the descendants of  $K$  from  $T$  can only introduce d-connecting paths that are  
 786 out of  $X$ .  $\square$

787 Now consider the d-connecting paths under conditioning on  $T'$ . We know that these paths must  
 788 have a tail either at  $X$  or at  $Y$ . Using the above claim that no path that has an arrowhead into  
 789 both endpoints are opened, we can use recursion and claim that we can make  $X, Y$  d-separated by  
 790 removing descendants of colliders (that are closest to the endpoint that is adjacent to a tail) of active  
 791 paths, which gives the following:

792 **Claim 2:** There exists a set  $T^*$  of size at most  $k$  such that  $X \perp\!\!\!\perp Y | T^*$ , which leads to a contradiction  
 793 since  $X, Y$  cannot be made independent by conditioning on sets of size at most  $k$  by the assumption.

794 *Proof of Claim 2.* Given claim 1, we can continue removing descendants of the colliders of the active  
 795 paths that are closest to the tail-end node from the set  $T$ . Either no d-connecting path is left at some  
 796 point in this process, or that we end up removing all the variables from the conditioning set. If former,  
 797 this is a contradiction since  $X, Y$  cannot be made conditionally independent given empty set. If the  
 798 latter is true, then there is another contradiction due to the following: This means that given empty  
 799 set, paths that have a tail adjacent to one of the endpoints, i.e., the paths with colliders on them (since  
 800 all paths that have a tail adjacent to one of the endpoints must have a collider because  $X \notin An(Y)$   
 801 and  $Y \notin An(X)$ ) are d-connecting, which is not possible. This proves Claim 2.  $\square$

802 Therefore, the supposition that the only d-connecting paths must have a tail adjacent to either endpoint  
 803 must be wrong, which proves the lemma.  $\square$

804 *Proof of Theorem 3.9* Now, we are ready to prove the main characterization theorem. We will need  
 805 the following lemma:

806 **Lemma B.15.** *Let  $\mathbb{K}$  be a mixed graph that satisfies the conditions in Theorem 3.9. Let  $\mathbb{K}'$  be the*  
 807 *graph obtained by removing all the bidirected edges from  $\mathbb{K}$ . Then*

808 1.  $\mathbb{K}'$  is a DAG and

809 2.  $\mathbb{K}' \sim_k \mathbb{K}$ .

810 *Proof.* Since the only difference between  $\mathbb{K}'$  and  $\mathbb{K}$  is the removal of bidirected edges, any directed  
 811 cycle that exists in  $\mathbb{K}'$  would also have existed in  $\mathbb{K}$ , which contradicts with the assumption that  $\mathbb{K}$  is  
 812 a MAG. This establishes that  $\mathbb{K}$  has no directed cycles.

813 Clearly, any independence statement in  $\mathbb{K}$  holds in  $\mathbb{K}'$ , since it is obtained from  $\mathbb{K}$  by removing edges.  
 814 Thus any degree- $k$  d-separation relation that holds in  $\mathbb{K}$  also holds in  $\mathbb{K}'$ . Therefore, we only need to  
 815 show that for any  $c$  of size at most  $k$   $(a \not\perp\!\!\!\perp b | c)_{\mathbb{K}}$  implies  $(a \not\perp\!\!\!\perp b | c)_{\mathbb{K}'}$ .

816 Suppose for the sake of contradiction that  $a \not\perp\!\!\!\perp b | c$  in  $\mathbb{K}$  but  $a \perp\!\!\!\perp b | c$  in  $\mathbb{K}'$ . Let  $p$  be a d-connecting  
 817 path between  $a, b$  given  $c$  in  $\mathbb{K}$ . This path must be closed in  $\mathbb{K}'$ . Since the only difference between  
 818 the two graphs is the removal of bidirected edges, ancestrality relations cannot be different. Thus, it  
 819 cannot be the case that a collider that was open in  $\mathbb{K}$  is now closed in  $\mathbb{K}'$  and is closing the path  $p$ .  
 820 Any collider that was open must still be open. Thus, the only way for  $p$  to be closed in  $\mathbb{K}'$  is if some  
 821 bidirected edge  $X \leftrightarrow Y$  along  $p$  is removed. However, by Lemma B.14, for any such bidirected  
 822 edge in  $\mathbb{K}$ , and for any conditioning set of size at most  $c$ , we have a d-connecting path called a  
 823 *replacement path* with an incoming edge to both  $X$  and  $Y$ . Consider the path  $q$  obtained by replacing  
 824 every bidirected edge along  $p$  with a corresponding replacement path. Since  $a, b$  are d-separated by  
 825 assumption, this path cannot be open. As this path is a concatenation of several d-connecting paths –  
 826 either sub-paths of  $p$ , which must be open, or replacement paths which must be open, by Lemma B.4,  
 827 they must have no overlapping nodes, and some node at the junction of these paths must be a collider  
 828 and non-ancestor of  $c$ . However, since we replaced bidirected edges  $X \leftrightarrow Y$  with paths of the form  
 829  $X \leftarrow * \dots * \rightarrow Y$ , both  $X$  and  $Y$  must have the same collider status on both  $p$  and  $q$ . Thus, they  
 830 cannot be blocking  $q$  since they are not blocking  $p$ . This means that  $q$  is d-connecting in  $\mathbb{K}'$ , which is  
 831 a contradiction. This proves the lemma that  $\mathbb{K}$  and  $\mathbb{K}'$  must entail the same degree- $k$  d-separation  
 832 relations, which implies they are  $k$ -Markov equivalent.  $\square$

833 The only if direction: Suppose a mixed graph is a  $k$ -closure graph, i.e.,  $\mathbb{K} = \mathcal{C}_k(D)$  for some DAG  
 834  $D$  and has the edge  $a \leftrightarrow b$ . Suppose for the sake of contradiction that  $a, b$  are not  $k$ -covered in  
 835  $\mathbb{K} - (a \leftrightarrow b)$ . Let  $\mathbb{K}'$  be the graph obtained from  $\mathbb{K}$  by removing all the bidirected edges. Note that  
 836  $\mathbb{K}'$  is a DAG since  $\mathbb{K}$  has no directed cycles. Also note that all edges in  $D$  must appear in  $\mathbb{K}'$  by  
 837 construction of  $k$ -closure graphs.  $D$  can therefore be obtained from  $\mathbb{K}$  by removing edges. Thus, any  
 838 d-separation statement in  $\mathbb{K}$  must also hold in  $D$ . Therefore,  $a, b$  must be conditionally independent  
 839 given some subset  $c$  of size at most  $k$  in  $D$ . This means  $\mathbb{K}$ , in which  $a, b$  are adjacent, cannot be the  
 840  $k$ -closure graph of  $D$ , which is a contradiction.

841 If direction: Suppose a mixed graph  $\mathbb{K}$  satisfies the conditions in Theorem 3.9. By Lemma B.15, for  
 842 any such mixed graph  $\mathbb{K}$ , there is a DAG whose  $k$ -closure is  $\mathbb{K}$ , which shows that any such  $\mathbb{K}$  is a  
 843 valid  $k$ -closure graph, proving the theorem.  $\square$

#### 844 B.4 Proof of Lemma 3.12

845 Let  $K_1 = \mathcal{C}_k(D_1), K_2 = \mathcal{C}_k(D_2)$  be two  $k$ -closure graphs with the same skeleton and unshielded  
 846 colliders. Suppose for the sake of contradiction that there is a path  $p$  that is discriminating for a triple  
 847  $\langle u, Y, v \rangle$  in both such that  $Y$  is a collider along  $p$  in  $\mathcal{C}_k(D_1)$  and a non-collider in  $\mathcal{C}_k(D_2)$ . Thus, in  
 848  $\mathcal{C}_k(D_1)$  we have the path  $p$  as

$$a * \rightarrow z_1 \leftrightarrow z_2 \leftrightarrow \dots \leftrightarrow z_m \leftrightarrow u \leftrightarrow Y \leftrightarrow v \quad (23)$$

849 where  $z_i \rightarrow v, \forall i$  and  $u \rightarrow v$  and  $a, v$  are non-adjacent. Note that we cannot have  $Y \leftarrow v$  instead of  
 850  $Y \leftrightarrow v$  since this would create the almost directed cycle  $u \rightarrow v \rightarrow Y \leftrightarrow u$ . The same path with  $Y$  as  
 851 a non-collider can take two configurations in  $\mathcal{C}_k(D_2)$ , either as

$$a * \rightarrow z_1 \leftrightarrow z_2 \leftrightarrow \dots \leftrightarrow z_m \leftrightarrow u \leftrightarrow Y \rightarrow v \quad (24)$$

852 or as

$$a * \rightarrow z_1 \leftrightarrow z_2 \leftrightarrow \dots \leftrightarrow z_m \leftrightarrow u \leftarrow Y \rightarrow v \quad (25)$$

853 Other paths where  $Y$  is a non-collider would either render  $u$  a non-collider, which cannot happen  
 854 by definition of a discriminating path, or create a directed or almost directed cycle. Since  $a, v$   
 855 are non-adjacent by definition of a discriminating path, there must be some  $S : |S| \leq k$  where  
 856  $(a \perp\!\!\!\perp v | S)_{\mathcal{C}_k(D_1)}$ . Note that  $S$  must include all  $z_i$ 's and  $u$ , and not include  $Y$  since otherwise there  
 857 would be d-connecting paths between  $a, v$  in  $\mathcal{C}_k(D_1)$  due to the discriminating path. This means that  
 858  $(a \not\perp\!\!\!\perp v | S)_{\mathcal{C}_k(D_2)}$ .

859 Since  $u \leftrightarrow Y$  in  $\mathcal{C}_k(D_1)$ , by Lemma B.2, there must be a d-connecting path between  $u, Y$  in  $D_1$   
 860 conditioned on  $S$  that has an arrowhead at  $Y$ . By construction, this path must also appear in  $\mathcal{C}_k(D_1)$ .  
 861 Since the path is inherited from  $D_1$ , it does not have bidirected edges. Consider the shortest of all  
 862 such d-connecting paths, call this path  $q$ . Let  $X$  be the node adjacent to  $Y$  along  $q$ . Thus,  $q$  has the  
 863 form

$$u \leftarrow \dots \rightarrow X \rightarrow Y. \quad (26)$$

864 We have that  $X \rightarrow Y$  in both  $D_1$  and  $\mathcal{C}_k(D_1)$ . In  $\mathcal{C}_k(D_1)$ , we have  $X \rightarrow Y \leftrightarrow v$ . Since the edge  
 865 between  $Y, v$  has a tail at  $Y$  in  $\mathcal{C}_k(D_2)$ , this collider cannot exist in  $\mathcal{C}_k(D_2)$ . Thus, it must be the case  
 866 that this collider is shielded in  $\mathcal{C}_k(D_1)$ , i.e.,  $X$  and  $v$  are adjacent in  $\mathcal{C}_k(D_1)$ . Since  $\mathcal{C}_k(D_1), \mathcal{C}_k(D_2)$   
 867 have the same skeleton, they must also be adjacent in  $\mathcal{C}_k(D_2)$ .

868 Now consider the path obtained by concatenating the subpath of  $p$   $a * \rightarrow \dots u$ , and the subpath of  $q$   
 869 between  $u$  and  $X$ , and the edge between  $X$  and  $v$  in  $\mathcal{C}_k(D_1)$ . Call this path  $r$ . Note that the subpath  
 870 of  $q$  is d-connecting given  $S$ , as well as the subpath of  $p$  since  $z_i$ 's and  $u$  are in  $S$ . Thus, unless  $X$  is  
 871 a collider on it, the path  $r$  between  $a, v$  will be open, which would lead to a contradiction since  $a, v$   
 872 are d-separated given  $S$  in  $\mathcal{C}_k(D_1)$ . Thus, the edge between  $X, v$  must have an arrowhead at  $X$ . Let  
 873  $W$  be the node before  $X$  along  $q$ . Thus we have  $W \rightarrow X \leftrightarrow v$  in  $\mathcal{C}_k(D_1)$ . Note that  $X \leftarrow v$  is not  
 874 possible since this would create an almost directed cycle  $X \rightarrow Y \leftrightarrow v \rightarrow X$  in  $\mathcal{C}_k(D_1)$ .

875 Suppose this collider is unshielded and appears in  $\mathcal{C}_k(D_2)$  as well:  $W * \rightarrow X \leftarrow * v$  in  $\mathcal{C}_k(D_2)$ . Thus  
 876 in  $\mathcal{C}_k(D_2)$ , we have  $Y \rightarrow v * \rightarrow X \leftarrow * W$ . Since  $X, Y$  are adjacent, it must be that  $X \leftarrow Y$  or  
 877  $X \leftrightarrow Y$  to avoid a directed or almost directed cycle. Thus in  $\mathcal{C}_k(D_2)$ , we have  $X \leftarrow * Y$ . However,  
 878 this creates the collider  $W * \rightarrow X \leftarrow * Y$  in  $\mathcal{C}_k(D_2)$ . Note that this collider cannot appear in  $\mathcal{C}_k(D_1)$   
 879 since the edge between  $X, Y$  has a tail at  $X$  in  $\mathcal{C}_k(D_1)$ . Thus the collider must be shielded, meaning  
 880 that  $W, Y$  must be adjacent, and both in  $\mathcal{C}_k(D_2)$  and in  $\mathcal{C}_k(D_1)$ . Since we have  $W \rightarrow X \rightarrow Y$   
 881 in  $\mathcal{C}_k(D_1)$ , the edge must be  $W \rightarrow Y$  in  $\mathcal{C}_k(D_1)$ . Furthermore, similar to  $X, W$  cannot be in the  
 882 conditioning set since this would block the path  $q$ . This means there is a d-connecting path that has  
 883 an arrowhead at  $Y$  that is shorter than  $q$ , which is a contradiction.

884 Thus the collider  $W \rightarrow X \leftrightarrow v$  in  $\mathcal{C}_k(D_1)$  must be shielded. Similar to the above argument,  $W$   
 885 must be a collider along the path constructed by concatenating the subpath  $a * \rightarrow \dots u$  of  $p$ , and the  
 886 subpath of  $q$  between  $u$  and  $W$ , and the edge between  $W$  and  $v$  since otherwise this path would be  
 887 open, which would contradict with  $a \perp\!\!\!\perp v | S$ . Let  $V$  be the node next to  $W$  along  $q$ . Thus we have  
 888  $V \rightarrow W \rightarrow X$  along  $q$  and  $V \rightarrow W \leftarrow * v$  is a collider in  $\mathcal{C}_k(D_1)$ . In fact, it must be that  $W \leftrightarrow v$   
 889 since otherwise there would be an almost directed cycle  $v \rightarrow W \rightarrow X \rightarrow Y \leftrightarrow v$  in  $\mathcal{C}_k(D_1)$ .

890 Suppose the collider  $V \rightarrow W \leftrightarrow v$  in  $\mathcal{C}_k(D_1)$  is unshielded and also appears in  $\mathcal{C}_k(D_2)$ . Note that if  
 891  $V, X$  were adjacent in  $\mathcal{C}_k(D_1)$ , the orientation would have to be as  $V * \rightarrow X$  since otherwise there

892 would be a directed cycle  $V \rightarrow W \rightarrow X \rightarrow V$  in  $\mathcal{C}_k(D_1)$ . But this would imply that there is a  
 893 shorter path than  $q$  that connects  $u, Y$  and has an arrow into  $Y$ . Thus,  $V, X$  must be non-adjacent in  
 894  $\mathcal{C}_k(D_1)$  and hence in  $\mathcal{C}_k(D_2)$ . Thus,  $\langle V, W, X \rangle$  is an unshielded non-collider in  $\mathcal{C}_k(D_1)$  and must  
 895 also be in  $\mathcal{C}_k(D_2)$ . Thus it must be that  $W \rightarrow X$  in  $\mathcal{C}_k(D_2)$ . Since  $v * \rightarrow W \rightarrow X$  in  $\mathcal{C}_k(D_2)$ , it  
 896 must be that  $v * \rightarrow X$  in  $\mathcal{C}_k(D_2)$  to avoid a directed or almost directed cycle. Since  $Y \rightarrow v * \rightarrow X$   
 897 in  $\mathcal{C}_k(D_2)$ , it must be that  $X \leftarrow * Y$  to avoid a cycle or almost directed cycle in  $\mathcal{C}_k(D_2)$ . However,  
 898 now we have a collider  $W \rightarrow X \leftarrow * Y$  in  $\mathcal{C}_k(D_2)$  that is a non-collider in  $\mathcal{C}_k(D_1)$  since in  $\mathcal{C}_k(D_1)$   
 899 we have  $X \rightarrow Y$ . Thus, this collider must be shielded, i.e,  $W, Y$  must be adjacent in  $\mathcal{C}_k(D_2)$ . Thus,  
 900 they must also be adjacent in  $\mathcal{C}_k(D_1)$ . Since  $W \rightarrow X \rightarrow Y$  in  $\mathcal{C}_k(D_1)$ , it must be that  $W \rightarrow Y$  in  
 901  $\mathcal{C}_k(D_1)$  to avoid a cycle. But this means there is a shorter d-connecting path between  $u, Y$  given  $S$   
 902 with an arrowhead at  $Y$ , which is a contradiction.

903 Therefore, the collider  $V \rightarrow W \leftrightarrow v$  must be shielded in  $\mathcal{C}_k(D_1)$ . We can repeat the above argument  
 904 as many times as needed continuing from the parent of  $V$  along  $q$ . As we keep shielding more and  
 905 more colliders in  $\mathcal{C}_k(D_1)$ , eventually when we shield the first node along  $q$  next to  $u$ , we will end up  
 906 with a directed path from  $u$  to  $Y$ . However, this is a contradiction since bidirected edge was added  
 907 between  $u, Y$  which implies that  $u$  is not an ancestor of  $Y$ .

908 Therefore, if two  $k$ -closure graphs  $\mathcal{C}_k(D_1), \mathcal{C}_k(D_2)$  have the same skeleton and unshielded colliders,  
 909 then they cannot have different colliders along discriminating paths, which proves the lemma.

910 **B.5 Proof of Corollary 3.13**

911 ( $\Rightarrow$ ) If they are Markov equivalent then by Lemma 3.8 they are two Markov equivalent MAGs.  
912 Therefore by Theorem 3.11 they have the same skeleton, and the same unshielded colliders.

913 ( $\Leftarrow$ ) If they have the same skeleton and the same unshielded colliders, then by Lemma 3.12 they  
914 must have the same colliders along discriminating paths. Thus, by Theorem 3.11 they are equivalent.  
915 □

916 **B.6 Proof of Theorem 3.14**

917 ( $\Rightarrow$ ) Suppose  $D_1, D_2$  are  $k$ -Markov equivalent. For the sake of contradiction suppose that  $\mathcal{C}_k(D_1)$   
 918 and  $\mathcal{C}_k(D_2)$  are not Markov equivalent. By Corollary 3.13 this happens when either they have  
 919 different skeletons, or different unshielded colliders. Thus, there are two cases:

920 ***k*-closures have different skeletons:**  $\mathcal{C}_k(D_1)$  and  $\mathcal{C}_k(D_2)$  have different skeletons. Suppose without  
 921 loss of generality that  $\mathcal{C}_k(D_1)$  has an extra edge, i.e.,  $a, b$  are adjacent in  $\mathcal{C}_k(D_1)$  but not in  $\mathcal{C}_k(D_2)$ .  
 922 This can only happen if  $\exists S \subset V : |S| \leq k$  such that  $(a \perp\!\!\!\perp b | S)_{D_2}$ , while there is no such separating  
 923 set in  $D_1$ , implying that  $(a \not\perp\!\!\!\perp b | S)_{D_1}$ . This is a contradiction with the supposition that  $D_1, D_2$  are  
 924  $k$ -Markov equivalent. Therefore,  $\mathcal{C}_k(D_1)$  and  $\mathcal{C}_k(D_2)$  must have the same skeletons.

925 For completeness, we restate the definition of unshielded collider in  $k$ -closure graphs, which is  
 926 identical to how it is defined in MAGs.

927 **Definition B.16.** A triple  $\langle a, c, b \rangle$  in a  $k$ -closure graph is called an unshielded collider if  $a, b$  are  
 928 non-adjacent,  $a, c$  and  $c, b$  are adjacent and the edges adjacent to  $c$  have an arrowhead mark at  $c$ .

929 According to the definition, a triple  $\langle a, c, b \rangle$  in a  $k$ -closure graph  $\mathcal{C}_k(D)$  can be an unshielded collider  
 930 if the induced subgraph on the nodes take either of the following configurations:

- 931 1.  $a \rightarrow c \leftarrow b$
- 932 2.  $a \rightarrow c \leftrightarrow b$
- 933 3.  $a \leftrightarrow c \leftarrow b$
- 934 4.  $a \leftrightarrow c \leftrightarrow b$

935 We use asterisk to represent either an arrowhead or a tail.  $*\rightarrow$  represents either  $\rightarrow, \leftrightarrow$ . Similarly,  $\leftarrow*$   
 936 represents either  $\leftarrow$  or  $\leftrightarrow$ .

937 ***k*-closures have different unshielded colliders:** Without loss of generality assume that  $(a* \rightarrow$   
 938  $c \leftarrow *b)_{\mathcal{C}_k(D_1)}$  but this unshielded collider does not exist in  $\mathcal{C}_k(D_2)$ , i.e.,  $\langle a, c, b \rangle$  is an unshielded  
 939 non-collider in  $\mathcal{C}_k(D_2)$ .

940 **Lemma B.17.** In a  $k$ -closure graph  $\mathcal{C}_k(D)$ , two nodes  $a, b$  are non-adjacent iff  $(a \perp\!\!\!\perp b | S)_{\mathcal{C}_k(D)}$  for  
 941 some  $S \subset V$ .

942 *Proof.* ( $\Rightarrow$ ) Suppose  $a, b$  are non-adjacent in  $\mathcal{C}_k(D)$ . Thus it must be the case that  $(a \perp\!\!\!\perp b | S)_D$  for  
 943 some  $S$  such that  $|S| \leq k$ , since otherwise  $a, b$  would be made adjacent during the construction of  
 944  $\mathcal{C}_k(D)$ . By Lemma 3.6 this means  $(a \perp\!\!\!\perp b | S)_{\mathcal{C}_k(D)}$ . This establishes the only if direction.

945 ( $\Leftarrow$ ) Suppose now that  $(a \perp\!\!\!\perp b | S)_{\mathcal{C}_k(D)}$ . By definition of d-separation, adjacent nodes cannot be  
 946 d-separated and thus  $a, b$  must be non-adjacent in  $\mathcal{C}_k(D)$ .  $\square$

947 **Lemma B.18.** In a  $k$ -closure graph  $\mathcal{C}_k(D)$ , any pair of non-adjacent nodes  $a, b$  are separable by a  
 948 set of size at most  $k$ , i.e.,  $\exists S : |S| \leq k, (a \perp\!\!\!\perp b | S)_{\mathcal{C}_k(D)}$ .

949 *Proof.* Suppose otherwise: For some non-adjacent pair  $a, b$  all d-separating sets in  $\mathcal{C}_k(D)$  have size  
 950 greater than  $k$ . Let  $S$  be the smallest subset that makes  $a, b$  d-separated, i.e.,  $(a \perp\!\!\!\perp b | S)_{\mathcal{C}_k(D)}$  – one  
 951 exists by Lemma B.17. Clearly,  $|S| > k$ . Note that non-adjacency of  $a, b$  in  $\mathcal{C}_k(D)$  implies that  
 952  $a, b$  are separable in  $D$  with some set  $T$  of size at most  $k$ :  $(a \perp\!\!\!\perp b | T)_D$ . Since  $|T| \leq k < |S|$  and  
 953  $S$  is the smallest subset that d-separates  $a, b$  in  $\mathcal{C}_k(D)$ , it must be that  $(a \not\perp\!\!\!\perp b | T)_{\mathcal{C}_k(D)}$ . However,  
 954 this contradicts with Lemma 3.6 which says that  $D$  and  $\mathcal{C}_k(D)$  must entail the same d-separation  
 955 constraints for conditioning sets of size up to  $k$ .  $\square$

956 Since  $a, b$  are non-adjacent in both graphs, by Lemma B.18 there are two subsets  $S_1, S_2$  of size at  
 957 most  $k$  such that

$$(a \perp\!\!\!\perp b | S_1)_{\mathcal{C}_k(D_1)}, (a \perp\!\!\!\perp b | S_2)_{\mathcal{C}_k(D_2)}. \quad (27)$$

958 Clearly,  $S_1 \not\ni c, S_2 \ni c$  since  $c$  is a collider between  $a, b$  in  $\mathcal{C}_k(D_1)$  and a non-collider in  $\mathcal{C}_k(D_2)$ . If  
 959 we switch the conditioning sets, due to the different collider status of  $c$  in both graphs the d-separation  
 960 statements will switch to d-connection statements:

$$(a \not\perp\!\!\!\perp b | S_1)_{\mathcal{C}_k(D_2)}, (a \not\perp\!\!\!\perp b | S_2)_{\mathcal{C}_k(D_1)}. \quad (28)$$



961 Since  $S_1$  and  $S_2$  have size of at most  $k$ , then from Lemma 3.6 we have that:

$$(a \perp\!\!\!\perp b | S_1)_{D_1}, (a \not\perp\!\!\!\perp b | S_1)_{D_2} \quad (29)$$

962 This implies that  $D_1, D_2$  are not  $k$ -Markov equivalent which is a contradiction.

963 This establishes that if  $D_1, D_2$  are  $k$ -Markov equivalent then  $\mathcal{C}_k(D_1), \mathcal{C}_k(D_2)$  must have the same  
 964 skeleton and the same unshielded colliders. By Corollary 3.13  $\mathcal{C}_k(D_1), \mathcal{C}_k(D_2)$  are Markov equivalent.  
 965

966 ( $\Leftarrow$ )

967 Suppose that  $\mathcal{C}_k(D_1)$  and  $\mathcal{C}_k(D_2)$  are Markov equivalent. Then they impose the same d-separation  
 968 statements. Therefore they impose the same d-separation statements when the conditioning set is  
 969 restricted to size at most  $k$ . By Lemma 3.6, this means that  $D_1, D_2$  must also impose the same  
 970 d-separation statements for conditioning sets of size of at most  $k$ . This establishes that  $D_1, D_2$  are  
 971  $k$ -Markov equivalent.  $\square$

972 **B.7 Proof of Lemma 4.1**

973 Suppose in the  $k$ -closure graph  $\mathcal{C}_k(D)$  for some DAG  $D$  and integer  $k$ , we have a discriminating path  
974 for  $Y$  between the nodes  $a, v$  of the form

$$a \ast \rightarrow \leftrightarrow \dots \leftrightarrow u \leftrightarrow Y \leftrightarrow v.$$

975 By definition of discriminating path,  $u$  must be a collider along the path, and  $u \rightarrow v$ . If  $Y \leftarrow v$ , then  
976 we would have an almost directed cycle  $u \rightarrow v \rightarrow Y \leftrightarrow u$ . Thus, we have  $u \leftrightarrow Y \leftrightarrow v$ .

977 First, we show that the arrowhead at  $Y$  of the edge  $Y \leftrightarrow v$  can be learned by first orienting unshielded  
978 colliders and then applying  $\mathcal{R}1$  and  $\mathcal{R}2$ . Consider the bidirected edge  $u \leftrightarrow Y$ . By definition of  
979 discriminating path  $a, v$  must be non-adjacent and thus separable by a set of size at most  $k$  by Lemma  
980 B.18. Therefore, we have a set  $S : |S| \leq k$  such that  $a \perp\!\!\!\perp v \mid S$ . By the discriminating path definition,  
981 every collider along the path must be a parent of  $v$ , and therefore it must be the case that every collider  
982 along the discriminating path including  $u$  must be in  $S$ , since otherwise there would be a d-connecting  
983 path. From Lemma B.2 conditioned on any set of size at most  $k$ , we have a d-connecting path  
984 that starts with an edge into  $Y$ . Consider the shortest such path  $q$ . Let  $X$  be the node immediately  
985 before  $Y$  along  $q$ . Since this path exists in the DAG by the lemma, we have  $X \rightarrow Y$ . If  $X, v$  are  
986 non-adjacent, then  $X \rightarrow Y \leftrightarrow v$  would be an unshielded collider and we are done.

987 Suppose  $X, v$  are adjacent. Note that conditioned on  $S$ ,  $a$  and  $X$  are d-connected. If  $X$  is a non-  
988 collider along the path obtained by concatenating the subpath of  $q$  between  $a, X$  and the edge between  
989  $X, v$ , then  $a, v$  would be d-connected given  $S$ , which is a contradiction. Therefore,  $X$  must be a  
990 collider along this path. Thus we have  $X \leftrightarrow v$ . Note that we cannot have  $X \leftarrow v$  since this would  
991 create an almost directed cycle in  $\mathcal{C}_k(D)$ . Let  $V$  be the node immediately before  $X$  along  $q$ . Thus we  
992 have  $V \rightarrow X \leftrightarrow v$  (not  $V \leftrightarrow X$  since this edge exists in  $D$ ).

993 Suppose  $V, v$  are non-adjacent. Thus, the collider  $V \rightarrow X \leftarrow \ast v$  is unshielded, and therefore can be  
994 learned. Furthermore,  $V, Y$  must be non-adjacent since otherwise, we must have  $V \rightarrow Y$  to avoid a  
995 cycle and there would be a path that is shorter than  $q$ , which “jumps over” the node  $X$  along  $q$ . Thus,  
996 we can learn that  $X \rightarrow Y$  from  $\mathcal{R}1$ . Finally, since now we have learned  $v \ast \rightarrow X \rightarrow Y$  and that  $Y, v$   
997 are adjacent, by  $\mathcal{R}2$ , we must have  $Y \leftarrow \ast v$ . Thus the arrowhead mark at  $Y$  of the edge  $Y \leftrightarrow v$  can  
998 be learned, and we are done.

999 Suppose  $V, v$  are adjacent. Following a similar argument, we either have some unshielded collider  
1000 that can be propagated using the argument above to orient  $Y \leftarrow \ast v$ , or we can continue covering  
1001 unshielded colliders, which would imply the previous nodes are always parents along  $q$ . But this  
1002 implies that  $u$  has a directed path to  $Y$ , which cannot happen since we have  $u \leftrightarrow Y$  in  $\mathcal{C}_k(D)$ . This  
1003 establishes that  $Y \leftarrow \ast v$  can be learned by orienting unshielded colliders and applying the rules  $\mathcal{R}1$   
1004 and  $\mathcal{R}2$ .

1005 For the arrowhead mark at  $Y$  of the edge  $u \leftrightarrow Y$ , similarly consider the shortest d-connecting path  
1006  $q$  between  $Y, v$  in  $D$  given  $S$  that starts with an arrow into  $Y$ . The argument follows similarly that  
1007 either there would be directed path from  $v$  to  $Y$ , which is a contradiction with the existence of the  
1008 edge  $Y \leftrightarrow v$  in the  $k$ -closure graph, or that there exists an unshielded collider along  $q$  that can be  
1009 learned by orienting unshielded colliders, which can be propagated to learn  $u \ast \rightarrow Y$  using rules  $\mathcal{R}1$ ,  
1010 and  $\mathcal{R}2$ . This establishes the lemma.  $\square$

## 1011 B.8 Proof of Theorem 4.4

1012 We show soundness of the two new rules with the following two lemmas:

1013 **Lemma B.19.** *Let  $K$  be a mixed graph that is sandwiched between  $\varepsilon_k(D)$  and  $PAG(\mathcal{C}_k(D))$ , i.e.,*  
 1014  *$\varepsilon_k(D) \subseteq K \subseteq PAG(\mathcal{C}_k(D))$ .  $\mathcal{R}11$  is sound on  $K$  for learning the  $k$ -essential graph, i.e., if*  
 1015  *$K' = \mathcal{R}11(K)$ , then  $\varepsilon_k(D) \subseteq K' \subseteq K$ .*

1016 *Proof.* For the sake of contradiction, suppose otherwise:  $\mathcal{R}11$  orients an edge  $ao \rightarrow b$  in  $K$  as  $a \rightarrow b$ ,  
 1017 and there is a DAG  $D'$  with a  $k$ -closure graph  $\mathcal{C}_k(D')$  that is Markov equivalent to  $\mathcal{C}_k(D)$  and is  
 1018 consistent with  $K$  where  $a \leftrightarrow b$ . This means  $a, b$  are  $k$ -covered in  $D'$ . Then from Lemma B.2  
 1019 conditioned on any subset  $S$  of size at most  $k$ , there must be a d-connecting path that starts with  
 1020 an arrow into both  $a$  and  $b$  in  $D$ . By construction of the  $k$ -closure graph, this path must also exist  
 1021 in  $\mathcal{C}_k(D')$ . Therefore, there must be some node  $w$  such that  $a \leftarrow w$ . Since  $a$  has no incoming  
 1022 edges, it must be the case that  $w \in C$ . However,  $b$  is chosen so that  $b$  is non-adjacent to any node  
 1023 in  $C$ . Therefore,  $b$  must be non-adjacent to  $w$  in  $K$ . However, this creates the unshielded collider  
 1024  $w \rightarrow a \leftrightarrow b$ . However, note that  $wo \rightarrow oao \rightarrow b$  in  $PAG(\mathcal{C}_k(D))$ , and thus  $\langle w, a, b \rangle$  is a non-collider  
 1025 in  $\mathcal{C}_k(D)$ . Therefore,  $\mathcal{C}_k(D')$  cannot be Markov equivalent to  $\mathcal{C}_k(D)$ , which is a contradiction.  $\square$

1026 **Lemma B.20.** *Let  $K$  be a mixed graph that is sandwiched between  $\varepsilon_k(D)$  and  $PAG(\mathcal{C}_k(D))$ , i.e.,*  
 1027  *$\varepsilon_k(D) \subseteq K \subseteq PAG(\mathcal{C}_k(D))$ .  $\mathcal{R}12$  is sound on  $K$  for learning the  $k$ -essential graph, i.e., if*  
 1028  *$K' = \mathcal{R}12(K)$ , then  $\varepsilon_k(D) \subseteq K' \subseteq K$ .*

1029 *Proof.* For the sake of contradiction, suppose otherwise:  $\mathcal{R}12$  orients an edge  $ao \rightarrow oc$  in  $K$  as  $a \rightarrow c$ ,  
 1030 and there is a DAG  $D'$  with a  $k$ -closure graph  $\mathcal{C}_k(D')$  that is Markov equivalent to  $\mathcal{C}_k(D)$  and is  
 1031 consistent with  $K$  where  $a \leftrightarrow c$ . This means  $a, c$  are  $k$ -covered in  $D'$ . Then from Lemma B.2  
 1032 conditioned on any subset  $S$  of size at most  $k$ , there must be a d-connecting path that starts with an  
 1033 arrow into both  $a$  and  $c$  in  $D$ . By construction of the  $k$ -closure graph, this path must also exist in  
 1034  $\mathcal{C}_k(D')$ . Therefore, there must be some node  $w$  such that  $a \leftarrow w$ . Since  $a$  has no incoming edges, it  
 1035 must be the case that  $w \in C$ . However,  $c$  is chosen so that  $c$  is non-adjacent to any other node in  $C$ .  
 1036 Therefore,  $c$  must be non-adjacent to  $w$  in  $K$ . However, note that  $wo \rightarrow oao \rightarrow oc$  in  $PAG(\mathcal{C}_k(D))$ , and  
 1037 thus  $\langle w, a, c \rangle$  is a non-collider in  $\mathcal{C}_k(D)$ . Therefore,  $\mathcal{C}_k(D')$  cannot be Markov equivalent to  $\mathcal{C}_k(D)$ ,  
 1038 which is a contradiction.  $\square$

1039 Now consider the execution of the algorithm  $k$ -PC. When the algorithm completes Step 4, from  
 1040 Corollary 4.2 we have that  $K = PAG(\mathcal{C}_k(D))$ . Since we start Step 5 with  $K = PAG(\mathcal{C}_k(D))$ , from  
 1041 Lemma B.19 and B.20 any arrowhead and tail orientation of the  $K$  obtained at the end of step 5 must  
 1042 be consistent with the  $k$ -essential graph of  $D$ . Therefore, we have that  $\varepsilon_k(D) \subseteq K$ .  $\square$

1043

**Algorithm 2** FCI\_Orient**Input:** Mixed graph  $K$ Apply the orientation rules of  $\mathcal{R}1, \mathcal{R}2, \mathcal{R}3$  of [22] to  $K$  until none applies.Apply the orientation rules of  $\mathcal{R}8, \mathcal{R}9, \mathcal{R}10$  of [22].**Output:**  $K$ 

We restate the FCI orientation rules in detail and demonstrate how they are applicable for learning  $k$ -closure graphs. The following definitions are from [22].

**Definition C.1** (Partial Mixed Graph (PMG)). Any graph that contains the edge marks arrowhead, tail, circle is called a partial mixed graph (PMG).

**Definition C.2** (Uncovered path). In a PMG, a path  $\langle u_1, u_2 \dots u_m \rangle$  is called an uncovered path if  $u_i, u_{i+2}$  are non-adjacent for all  $i \in \{1, 2, \dots, m-2\}$ .

**Definition C.3** (Potentially directed path). In a PMG, a path  $\langle u_1, u_2 \dots u_m \rangle$  is called a potentially directed (p.d.) path if the edge between  $u_i$  and  $u_{i+1}$  does not have an arrowhead at  $u_i$  for all  $i \in \{1, 2, \dots, m-1\}$ .

**Definition C.4** (Circle path). In a PMG, a path  $\langle u_1, \dots, u_m \rangle$  is called a circle path if  $u_i o \text{---} o u_{i+1}$  for all  $i \in \{1, 2, \dots, m-1\}$ .

Note that circle paths are special cases of p.d. paths.

Rules 1, 2, 3 are straightforward extensions of the orientation rules for constraint-based learning to mixed graphs. For completeness, we restate them below. The star marks that appear both before and after the application of the rules are edge marks that remain unchanged by the rule.

$\mathcal{R}1$ : If  $a * \rightarrow b o \text{---} * c$ , and  $a, c$  are not adjacent, then orient the triple as  $a * \rightarrow b \rightarrow c$ .

$\mathcal{R}2$ : If  $a \rightarrow b * \rightarrow c$  or  $a * \rightarrow b \rightarrow c$  and  $a * \text{---} o c$ , then orient  $a * \text{---} o c$  as  $a * \rightarrow c$ .

$\mathcal{R}3$ : If  $a * \rightarrow b \leftarrow * c$ ,  $a * \text{---} o d o \text{---} * c$ ,  $a, c$  are non-adjacent, and  $d * \text{---} o b$  then orient  $d * \text{---} o b$  as  $d * \rightarrow b$ .

We now restate FCI+ rules<sup>3</sup>  $\mathcal{R}8, \mathcal{R}9, \mathcal{R}10$  and explain their relevance for learning  $k$ -closure graphs. Note that the rules are simplified since we do not have undirected edges that represent selection bias, and our undirected edges are treated as if they are circle edges.

$\mathcal{R}8$ : If  $a \rightarrow b \rightarrow c$  and  $a o \rightarrow c$ , orient  $a o \rightarrow c$  as  $a \rightarrow c$ .

$\mathcal{R}9$ : If  $a o \rightarrow c$ , and  $p = \langle a, b, u_1, u_2 \dots u_m, c \rangle$  is an uncovered p.d. path from  $a$  to  $c$  such that  $b, c$  are non-adjacent, then orient  $a o \rightarrow c$  as  $a \rightarrow c$ .

$\mathcal{R}10$ : Suppose  $a o \rightarrow c, b \rightarrow c, d \rightarrow c$ ,  $p_1$  is an uncovered p.d. path from  $a$  to  $d$  and  $p_2$  is an uncovered p.d. path from  $a$  to  $b$ . Let  $t_d$  be the node adjacent to  $a$  on  $p_1$  ( $t_d$  can be  $d$ ) and  $t_c$  be the node adjacent to  $a$  on  $p_2$  ( $t_c$  can be  $c$ ). If  $t_d, t_c$  are distinct and non-adjacent, then orient  $a o \rightarrow c$  as  $a \rightarrow c$ .

$\mathcal{R}11$  and  $\mathcal{R}12$  cannot replace any of the above rules. For example, consider Figure 5. None of the FCI rules apply to the output of Step 3, thus we can only learn of the unshielded colliders at the end of Step 4 of the algorithm. The completeness of FCI implies that any edge  $x o \rightarrow y$  can be oriented as  $x \leftrightarrow y$  or  $x \rightarrow y$  and give a MAG consistent with the PAG. However, not all such MAGs are valid  $k$ -closure graphs.  $\mathcal{R}11$  can be applied to orient several tails, which gives the graph in (d). Similarly in Figure 6,  $\mathcal{R}12$  helps orient the tail edges between  $a, b$  which cannot be learned by FCI rules.

<sup>3</sup>This version was originally called A-FCI, short for augmented FCI rules by [22]. Augmented graphs are recently used in a different context in the causality literature, which is why in this work we are calling this version FCI+ to avoid confusion.

1079 **D Sample Runs of  $k$ -PC Algorithm**

1080 Consider the figures below for two sample runs of  $k$ -PC algorithm. Note that  $k$ -PC outputs the  
 1081  $k$ -essential graph in these examples, i.e., it can orient every invariant arrowhead and tail mark in the  
 1082  $k$ -closure graph of  $D$ .

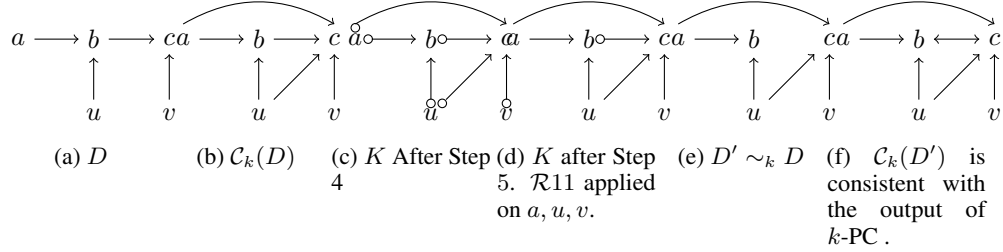

Figure 5: An example where  $\mathcal{R}11$  helps orient tails. (a) A DAG  $D$ . (b)  $k$ -closure graph of  $D$  for  $k = 0$ . (c)  $K$  after Step 4 of  $k$ -PC, the same as  $PAG(\mathcal{C}_k(D))$ . (d)  $\mathcal{R}11$  helps orient several tail edges. (e) A DAG  $D'$  that is  $k$ -Markov to  $D$ . (f)  $k$ -closure graph of  $D'$ , which is Markov equivalent to  $\mathcal{C}_k(D)$ , showing that the circle at  $bo \rightarrow c$  is not an invariant tail. Thus  $k$ -PC outputs  $k$ -essential graph  $\varepsilon_k(D)$  in this case.

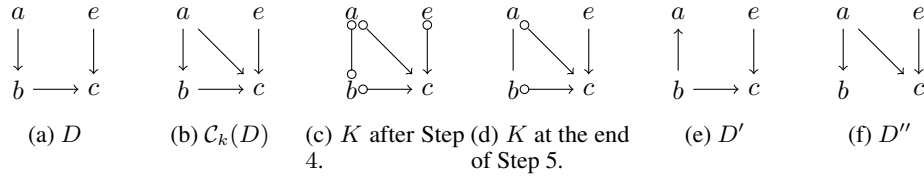

Figure 6: (a) A causal graph  $D$ . (b)  $k$ -closure of  $D$  for  $k = 0$ . (c)  $K$  at the end of Step 4. (d) Node  $a$  has one edge  $ao \rightarrow o$ ,  $ao \rightarrow ob$ . Thus we have  $\mathcal{C} = \mathcal{C}^*$  since  $b$  is non-adjacent to any other nodes in  $\mathcal{C}$  since there are no other nodes in  $\mathcal{C}$ . Thus it is oriented as  $a \rightarrow b$  due to  $\mathcal{R}12$ .  $e \rightarrow c$  is oriented due to  $\mathcal{R}11$ , similarly since  $\mathcal{C} = \emptyset$  and the node  $c$  is trivially non-adjacent to all nodes in  $\mathcal{C}$ . (e, f)  $D'$ ,  $D''$  are  $k$ -Markov equivalent to  $D$  and their  $k$ -closure graphs contain  $a \leftrightarrow c$  and  $b \leftrightarrow c$ , respectively. This shows that the graph in (d) given by  $k$ -PC is the  $k$ -essential graph  $\varepsilon_k(D)$ .

## 1083 E Discussions

### 1084 E.1 No Local $k$ -Markov Equivalence Characterization on DAG Space

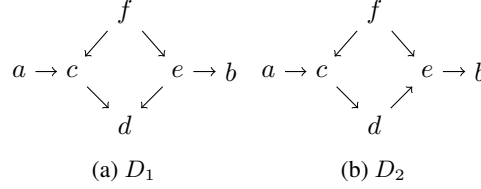

Figure 7: As a collider,  $d$  blocks the path  $(a, c, d, e, b)$  in  $D_3$ , but not in  $D_4$ . Accordingly,  $(a \perp\!\!\!\perp b)_{D_1}$ ,  $(a \not\perp\!\!\!\perp b)_{D_2}$  and  $D_1, D_2$  are not  $k$ -Markov for  $k = 0$ . However, this does not appear as a local condition since  $c, e$  are not separable by conditioning sets of size up to 0 in both graphs. Therefore, a local characterization of equivalence like Verma and Pearl is not possible when we are only allowed to check degree- $k$  d-separation tests.

1085 Consider the graphs in Figure 7. The only difference is the orientation of the edge between  $e, d$ . Due to the collider  $c \rightarrow d \leftarrow e$ , we have  $a \perp\!\!\!\perp b$  in  $D_1$  but not in  $D_2$ . Therefore for  $k = 0$ , we have that  
 1086  $D_1, D_2$  are not  $k$ -Markov equivalent. However, this is not detectable locally: The endpoints of the  
 1087 collider responsible for the change of the  $k$ -Markov equivalence class cannot be d-separated. The  
 1088 effect of the collider can be detected only farther out in the graph between  $a, b$ . This shows that a  
 1089 local characterization similar to Theorem 2.10 is not possible for  $k$ -Markov equivalence.  
 1090

### 1091 E.2 $k$ -closure Graphs vs. MAGs

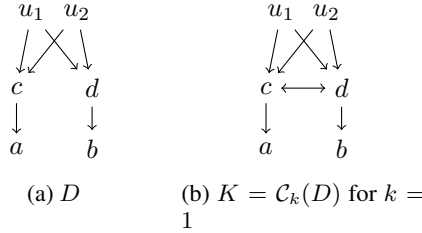

Figure 8: The mixed graph on the right is a valid  $k$ -closure graph for  $k = 1$ : It is the  $k$ -closure graph of the DAG in (a). However, it is not a valid  $k$ -closure graph for  $k = 2$ . Because after removing  $c \leftrightarrow d$ , it is possible to d-separate  $c, d$  by conditioning on  $u_1, u_2$ .

1092 In this section, we give an example for a MAG that is not a valid  $k$ -closure graph. Consider the  
 1093 graph in Figure 8.  $K$  in (b) is a valid  $k$ -closure graph for  $k = 1$  since it is the  $k$ -closure graph of  $D$ .  
 1094 However,  $K$  is not a valid  $k$ -closure graph for  $k = 2$ . This is because the bidirected edge  $c \leftrightarrow d$  is  
 1095 added between a pair that is not  $k$ -covered for  $k = 2$ : We have  $c \perp\!\!\!\perp d | u_1, u_2$  in  $D$ . In fact, using the  
 1096 if and only if characterization in Theorem 3.9, we can show that there does not exist any  $D'$  with the  
 1097 given  $k$ -closure graph where  $c, d$  have a bidirected edge.

### 1098 E.3 Bidirected Edge in $k$ -essential Graphs

1099 In Figure 9, since every endpoint is an arrowhead and is part of an unshielded collider, there is no  
 1100 other Markov equivalent  $k$ -closure graphs, which implies that the  $k$ -essential graph is the same as  
 1101 the  $k$ -closure graph. Thus, the edge  $c \leftrightarrow e$  is in  $\varepsilon_k(D)$ . This example shows that we can learn that  
 1102 two nodes do not cause each other using *conditional independence tests that are not even powerful*  
 1103 *enough to make them conditionally independent*. It is worth noting that LOCI [20] can also infer this  
 1104 fact by removing this edge.

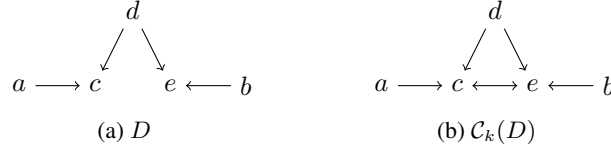

Figure 9: A DAG with a size-1  $k$ -Markov equivalence class for  $k = 1$ . Observe that  $\mathcal{C}_k(D)$  only has unshielded colliders and thus there is no other  $k$ -closure graph that is Markov equivalent. Thus, this  $k$ -closure is at the same time the  $k$ -essential graph of  $D$  and can be learned from data. In this case, we can learn  $c, e$  do not cause each other despite not being separable in the data.

#### 1105 E.4 $k$ -PC is Incomplete

1106 One might hope that  $k$ -PC is complete and outputs the  $k$ -essential graph  $\varepsilon_k(D)$ . This, however, is  
 1107 not true. We discuss an example where  $k$ -PC cannot orient an invariant tail mark.

1108 First, observe that  $k$ -PC does not leverage the value of  $k$ . If we had an efficient way to answer the  
 1109 question “Is there a  $k$ -closure graph that is consistent with  $K$  in which  $a, b$  are  $k$ -covered?” then we  
 1110 could leverage this to orient more  $o \rightarrow$  edges as  $\rightarrow$  edges. As an example, consider the causal graph  
 1111 in Figure 10.  $d$  may have an incoming edge that prevents us from eliminating the possibility that  
 1112  $do \rightarrow b$  is a bidirected edge  $d \leftrightarrow b$ . However, we can only have a single d-connecting path between  
 1113  $d, b$ . Since  $d$  is a non-collider along  $a \rightarrow d \rightarrow c$ , one of the edges must be out of  $d$ . Suppose  $d \leftarrow a$  and  
 1114  $d \rightarrow c$ . For  $c$  to not block this path it has to be a non-collider, and thus  $c \rightarrow b$ . This is the only way  
 1115 we can have two d-connecting paths between  $d, b$  in the underlying DAG. However, now we have the  
 1116 path  $d \rightarrow c \rightarrow b$ , which makes  $d$  an ancestor of  $b$ . Therefore the edge  $d \leftrightarrow b$  is inconsistent. Thus in  
 1117  $k$ -essential graph of  $D$ , we must have a tail at  $d$  as  $d \rightarrow b$ . This cannot be learned by  $k$ -PC.

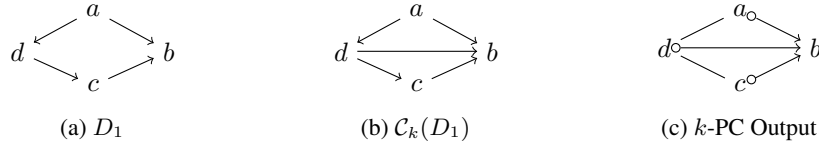

Figure 10: A graph where  $k$ -essential graph contains an invariant tail that cannot be learned by  $k$ -PC algorithm.  $k = 1$ ; thus  $d, b$  are  $k$ -covered but not  $a, c$ , which gives the  $k$ -closure graph on the right.  $k$ -PC algorithm outputs the graph in (c). However, there is no  $k$ -closure in the Markov equivalence class where  $d \leftrightarrow b$ . Thus the edge in the  $k$ -essential graph should be  $d \rightarrow b$ . Similarly,  $a \rightarrow b$  should be  $a \rightarrow b$ , however this requires reasoning about the number of d-connecting paths between  $a, b$  in  $K$  that is not captured in  $k$ -PC.

1118 We observe that a local algorithm such as  $k$ -PC cannot be used to assess if there is some  $k$ -closure  
 1119 graph that is consistent with the current graph in which two nodes are  $k$ -covered without the edge  
 1120 between them. One practical strategy would be to take the output of the  $k$ -PC algorithm and list all  
 1121 MAGs consistent with the circle edges, and then check if they are valid  $k$ -closure graphs by pruning  
 1122 every edge using Theorem 3.9. For small or sparse  $k$ -closure graphs,  $k$ -PC could be a practical way  
 1123 to reduce the search space efficiently, and then we can conduct an exhaustive search as the next step  
 1124 to obtain a sound and complete algorithm for learning the  $k$ -essential graph.

#### 1125 E.5 Heuristic Uses of Bounded Size Conditioning Sets

1126 For large number of variables, and except for very sparse graphs, constraint-based algorithms take  
 1127 significant time to complete. This is because the progressive nature of such tests is not able to  
 1128 sufficiently sparsify the graph with low-degree conditional independence tests, and they have to  
 1129 perform many tests: If the neighbor size is  $\mathcal{O}(n)$ , where  $n$  is the number of nodes, algorithm needs to  
 1130 check exponentially many subsets of nodes in the conditioning set.

1131 To prevent this issue, several implementations of these algorithms have the added functionality to  
 1132 restrict this search by limiting the size of the conditioning set. For example, causal-learn package has  
 1133 this functionality. However, this is a heuristic that simply prematurely stops the search algorithms.



1134 The results of our paper build the theoretical understanding of what is learnable in this setting with a  
 1135 new equivalence class and its graphical representation.

## 1136 E.6 Comparison of $k$ -PC Output to LOCI Output

1137 **Lemma E.1.** *Consider three nodes  $a, b, c$ . Suppose  $a \not\perp\!\!\!\perp b|S$ ,  $b \not\perp\!\!\!\perp c|S$ ,  $a \perp\!\!\!\perp c|S$  for some set  
 1138  $S : |S| \leq k$  and  $b \notin S$ . If  $b, c$  are  $k$ -covered, then  $k$ -PC orients the edge between  $b, c$  as  $b \leftarrow^* c$ .*

1139 *Proof.* In the following, we show that given the CI pattern that LOCI uses to orient edges,  $k$ -PC also  
 1140 orients the same edges. Consider the CI pattern that LOCI uses between three nodes  $a, b, c$ .

1141 Conditioned on  $S$ , there is a d-connecting path between  $a, b$ ; let us call this path  $p$ . Conditioned on  
 1142  $S$ , there is a d-connecting path between  $b, c$ ; let us call this path  $q$ . Consider the path obtained by  
 1143 concatenating  $p, q$ . Since this path must be d-separating,  $b$  must be a collider on it and it must be the  
 1144 case that  $b \notin \text{An}(S)$ . Let the node that is adjacent to  $b$  along  $p$  be  $a'$  and the node adjacent to  $b$  along  
 1145  $q$  be  $c'$ . Thus we have  $a' \rightarrow b \leftarrow c'$ .

1146 **Case 1:** Now suppose that  $a'$  and  $c$  are separable by some  $T : |T| \leq k$ .  $k$ -PC would then orient  
 1147  $a'^* \rightarrow b \leftarrow^* c$  since  $b, c$  remains adjacent throughout the execution of  $k$ -PC. Thus  $b \leftarrow^* c$  would be  
 1148 oriented in this case.

1149 **Case 2:** Suppose that  $a', c$  are  $k$ -covered. Then, given  $S$ , there is a d-connecting path between  $a', c$ .  
 1150 Now consider the path obtained by concatenating the subpath of  $p$  between  $a, a'$  and this d-connecting  
 1151 path. Since  $a, c$  are d-separated given  $S$ ,  $a'$  must be a collider along this path and a non-ancestor of  $S$ .  
 1152 Thus we must have  $a'' \rightarrow a' \rightarrow b$  as the last three nodes of path  $p$ .

1153 **Case 2.a:** Suppose  $a'', c$  are separable by some  $T : |T| \leq k$ . Since  $a', c$  are  $k$ -covered, they remain  
 1154 adjacent throughout the execution of  $k$ -PC. Thus,  $k$ -PC would orient  $a''^* \rightarrow a' \leftarrow^* c$ . Now we  
 1155 consider two sub-cases:

1156 **Case 2.a.i:** Suppose  $a'', b$  are separable by some set of size at most  $k$ . Then,  $a''^* \rightarrow a' \leftarrow b$  is an  
 1157 unshielded triple and it would be oriented by the first Meek rule of  $k$ -PC as  $a''^* \rightarrow a' \rightarrow b$ . Now we  
 1158 have the following edges oriented:  $b \leftarrow^* a' \leftarrow^* c$ , and  $b, c$  adjacent. By the second Meek rule,  $k$ -PC  
 1159 will then orient  $b \leftarrow^* c$ . This establishes that in this sub-case,  $k$ -PC would also orient the arrowhead  
 1160 adjacent to  $b$  for the edge between  $b, c$ .

1161 **Case 2.a.ii:** Now consider the second sub-case: Suppose  $a'', b$  are  $k$ -covered. Thus, throughout  
 1162 the execution of  $k$ -PC,  $a'', b$  are adjacent. In this case,  $a'' o \text{---} o b o \text{---} o c$  forms an unshielded collider  
 1163 and the algorithm would orient them as  $a''^* \rightarrow b \leftarrow^* c$  due to the independence statement  $a'' \perp\!\!\!\perp c|T$ .  
 1164 Therefore, the arrowhead at  $b$  would be oriented in this case as well.

1165 **Case 2.b:** Now suppose  $a'', c$  are  $k$ -covered. Thus, there must be a d-connecting path between  
 1166  $a'', c$  given  $S$ . Now consider the path obtained by concatenating the subpath of  $p$  between  $a, a''$   
 1167 and this d-connecting path. Since  $a \perp\!\!\!\perp c|S$ , it must be that  $a''$  is a collider along this path and that  
 1168  $a'' \notin \text{An}(S)$ . Thus, along this path we have  $a''' \rightarrow a'' \leftarrow \dots$ . Therefore, the last four nodes of the  
 1169 path  $p$  is  $a''' \rightarrow a'' \rightarrow a' \rightarrow b$ , and  $a', c$  are  $k$ -covered,  $a'', c$  are  $k$ -covered.

1170 **Case 2.b.i:** Now suppose  $a''', c$  are separable by some  $T : |T| \leq k$ .

1171 **Case 2.b.i.α:** If the pair  $a''', b$  is  $k$ -covered, following the above argument, we would orient  
 1172  $a'''^* \rightarrow b \leftarrow^* c$  with the statement  $a''' \perp\!\!\!\perp c|S$ , and the arrowhead adjacent to  $b$  along the edge  
 1173 between  $b, c$  would have been oriented.

1174 **Case 2.b.i.β:** Suppose  $a''', b$  pair is separable.

1175 **Case 2.b.i.β.1:** Suppose  $a''', a'$  is  $k$ -covered. We would orient  $a'''^* \rightarrow a' \leftarrow^* c$  due to the  
 1176 statement  $a''' \perp\!\!\!\perp c|S$ . And since  $a''', b$  are not  $k$ -covered, Meek rule one would orient the subgraph  
 1177  $a'''^* \rightarrow a' o \text{---} o b$  as  $a'''^* \rightarrow a'^* \rightarrow b$ . Since  $b \leftarrow^* a' \leftarrow^* c$  and  $b o \text{---} o c$ , second Meek rule would orient  
 1178 the arrowhead at  $b$  along the edge between  $b, c$ .

1179 **Case 2.b.i.β.2:** Finally, suppose  $a''', b$  and  $a''', a'$  are both separable. Now  $k$ -PC applies Meek rule  
 1180 one directly to orient  $a'''^* \rightarrow a''^* \rightarrow a'$ . Now that we have  $a' \leftarrow^* a'' \leftarrow^* c$ , and that  $a', c$  are adjacent,  
 1181 Meek rule two will orient  $a' \leftarrow^* c$ . Another application of Meek rule one would give  $a''^* \rightarrow a'^* \rightarrow b$   
 1182 and now since we have  $b \leftarrow^* a' \leftarrow^* c$  and that  $b, c$  are adjacent, Meek rule two would orient  $b \leftarrow^* c$ .

1183 **Case 2.b.j and beyond:** Finally, if  $a'''$ ,  $c$  are  $k$ -covered, following a similar argument, either the node  
 1184 adjacent to  $a'''$  along  $p$  (towards  $a$ ) is separable with  $c$ , in which case following a similar argument  
 1185 as above would orient  $b \leftarrow^* c$ , or we continue until  $a, c$  become adjacent. The latter cannot happen  
 1186 since that contradicts with the fact that  $a \perp\!\!\!\perp c | S$ . Thus, there must exist some node  $u$  along  $p$  that  
 1187 is separable from  $c$ , and the subpath of  $p$  between  $u, b$  is directed. Following the argument above,  
 1188 repeated application of Meek rules one and two will result in the orientation of the edge between  $b, c$   
 1189 as  $b \leftarrow^* c$ . This establishes that  $k$ -PC orients at least as much arrowheads as LOCI.  $\square$

1190 The corollary of this lemma is that  $k$ -PC orients all arrowheads oriented by LOCI:

1191 **Corollary E.2.** *Any arrowhead oriented by LOCI is also oriented by  $k$ -PC.*

1192 *Proof.* Suppose  $a \not\perp\!\!\!\perp b | S$ ,  $b \not\perp\!\!\!\perp c | S$ ,  $a \perp\!\!\!\perp c | S$  for some set  $S : |S| \leq k$  and  $b \notin S$ . Observe that if  
 1193  $a, b$  and  $b, c$  are  $k$ -covered then  $k$ -PC would orient the edges between them as  $a \rightarrow^* b \leftarrow^* c$  due to  
 1194 the independence statement  $a \perp\!\!\!\perp c | S$ . Moreover, if  $a, b$  and  $b, c$  are both separable by some sets  
 1195 of size at most  $k$ , then both LOCI and  $k$ -PC would make  $a, b$  and  $b, c$  non-adjacent and thus neither  
 1196 algorithm orients an edge between them. Therefore, the only non-trivial case is when only one of  
 1197 the two pairs is  $k$ -covered. For this case, since the pre-condition of Lemma E.1 is identical to the  
 1198 condition of LOCI to orient any edge.

1199 LOCI applies the three Meek rules after orienting these arrowhead marks. Since  $k$ -PC repeatedly  
 1200 applies a set of Meek rules that include these three rules,  $k$ -PC orients at least as many arrowheads as  
 1201 LOCI. Thus, the corollary follows.  $\square$

1202 Next, we show that they both carry the same adjacency information.

1203 **Corollary E.3.** *Any pair that is non-adjacent in LOCI output is either non-adjacent, or adjacent via*  
 1204 *a bidirected edge in  $k$ -PC output.*

1205 *Proof.* LOCI makes a pair non-adjacent in two ways. If LOCI makes a pair non-adjacent since they  
 1206 are separable,  $k$ -PC also will make them non-adjacent. Suppose LOCI makes a pair  $a, b$  non-adjacent  
 1207 due to the following CI pattern, which are otherwise  $k$ -covered :  $u \not\perp\!\!\!\perp a | S_1$ ,  $a \not\perp\!\!\!\perp b | S_1$ ,  $u \perp\!\!\!\perp b | S_1$   
 1208 and  $a \not\perp\!\!\!\perp b | S_2$ ,  $b \not\perp\!\!\!\perp v | S_2$ ,  $a \perp\!\!\!\perp v | S_2$  for some  $u, v, S_1, S_2$ . Note that by Lemma E.1,  $k$ -PC marks  
 1209 both endpoints of the edge between  $a, b$  as arrowheads. This concludes the proof.  $\square$

1210 These results can be combined with the example in Figure 2 to show that the  $k$ -PC output carries  
 1211 strictly more information about the set of causal graphs that entail the set of degree- $k$  d-separation  
 1212 statements than the output of LOCI, even though  $k$ -PC is not complete for learning our equivalence  
 1213 class as discussed in Section E.4.

## 1214 F Additional Experiments

### 1215 F.1 Experiments vs. LOCI

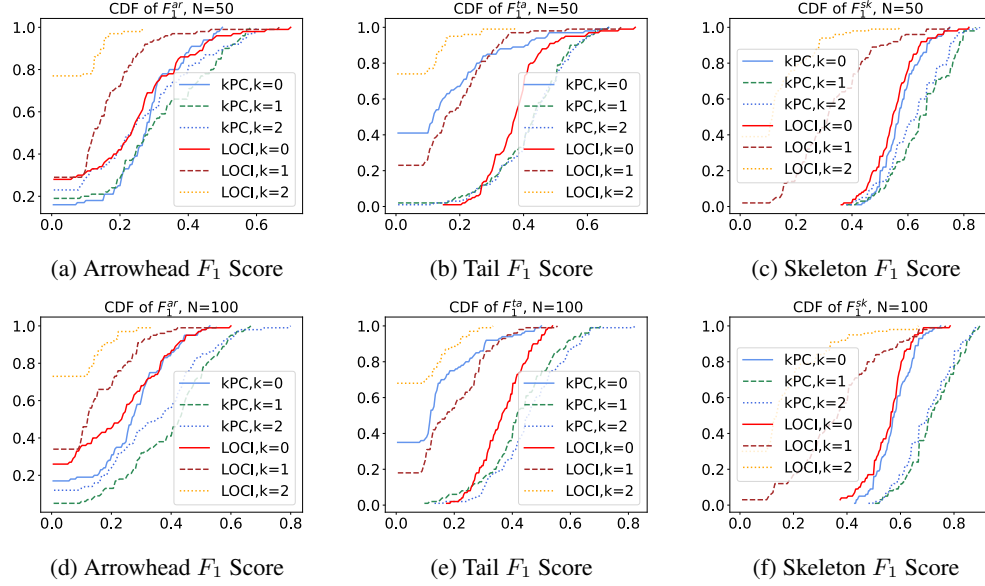

Figure 11: Empirical cumulative distribution function of various  $F_1$  scores on 100 random DAGs on 10 nodes. We pick the parents of each node in a fixed total order randomly so that the expected value of parents is 3. The conditional distribution of every node given any configuration of its parent set is sampled independently, uniformly randomly from the corresponding dimensional probability simplex. Three datasets are sampled per instance. Performance of  $k$ -PC and LOCI [20] are similar as expected. We still observe a similar trend as PC that arrowhead score of  $k$ -PC is better. For tail accuracy, the result depends on the value of  $k$ . For small  $k$ , LOCI outperforms  $k$ -PC whereas for larger  $k$ ,  $k$ -PC outperforms LOCI in the small sample regime. Different from Figure 3, we compare the outputs to the true DAG instead of essential graph since no algorithm in this comparison can achieve essential graph.

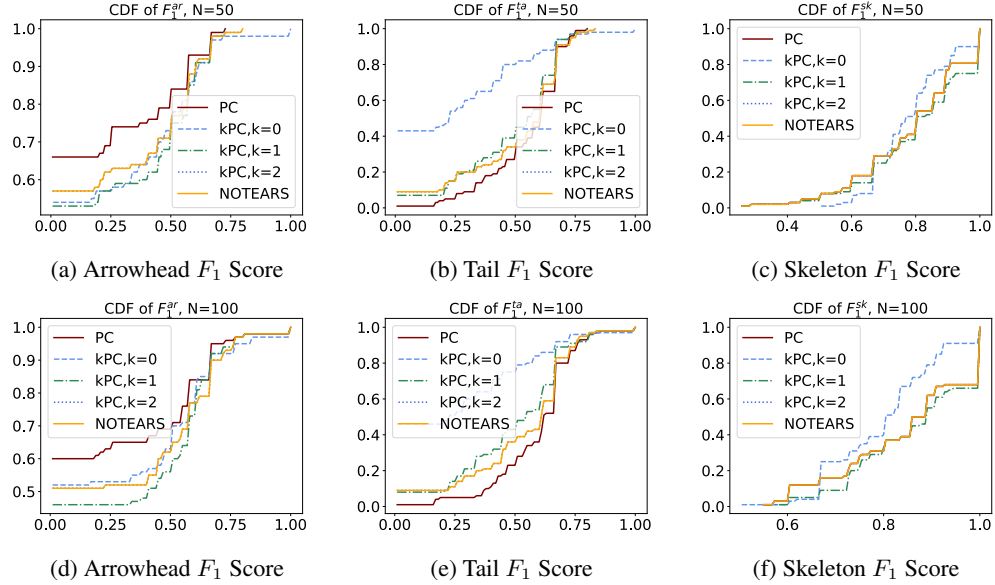

Figure 12: Empirical cumulative distribution function of various  $F_1$  scores on 100 random DAGs on 5 nodes. For each DAG, a linear SCM is sampled as follows: Each coefficient is chosen randomly in the range  $[-3, 3]$ . Exogenous noise terms are jointly independent unit Gaussian. Performance of  $k$ -PC vs. NOTEARS [25]. We observe a similar trend as PC. NOTEARS is slightly better than PC consistently. Despite this,  $k$ -PC outperforms both in the low-sample regime. Metrics are computed against the true DAG.

### 1217 E.3 More Experiments vs. PC

1218 In this section, we show a larger range of  $N$  (number of samples). We also explore the behavior for  
 1219 graphs with different edge densities and higher number of nodes (10).

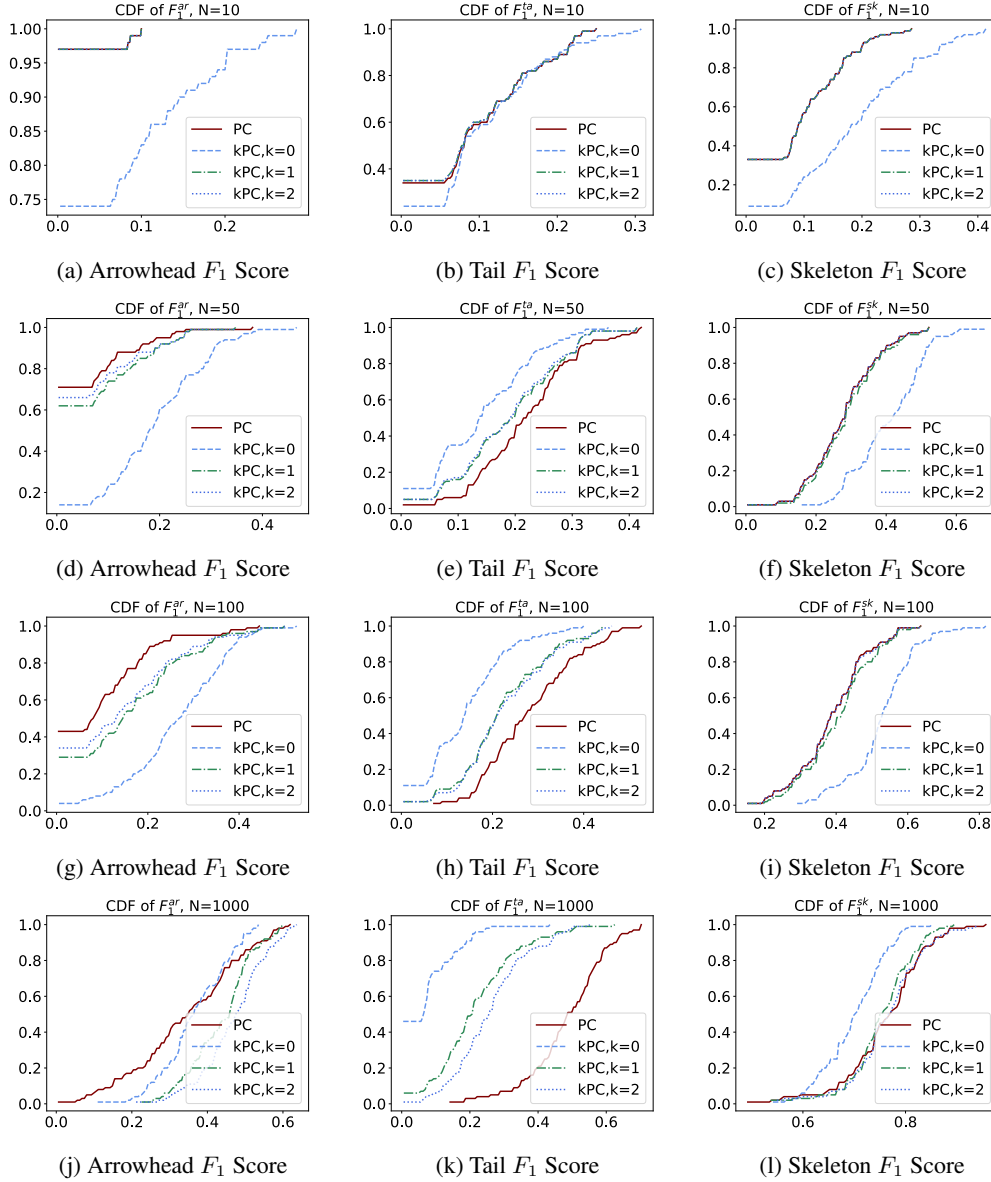

Figure 13: Empirical cumulative distribution function of various  $F_1$  scores on 100 random DAGs on 10 nodes. For each DAG, conditional probability tables are independently and uniformly randomly filled from the corresponding probability simplex. Three datasets are sampled per instance. The lower the curve the better. The maximum number of edges is 30. Even in the extreme case of just 10 samples (10 node-graphs),  $k$ -PC for  $k = 0$  provides improvement to all scores.  $k$  should be gradually increased as more samples are available to make best use of the available data. For example, for 1000 samples,  $k = 2$  provides the best arrowhead score while not giving up as much tail score as  $k = 0$ .

1220 Next, we present combined metrics for this same setup. Namely, we show the advantage of our  
 1221 algorithm in terms of the sum of arrowhead and tail  $F_1$  scores, and the sum of arrowhead, tail and  
 1222 skeleton  $F_1$  scores.

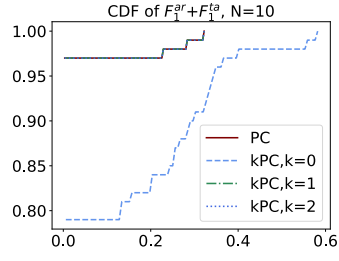(a) Arrowhead + Tail  $F_1$ 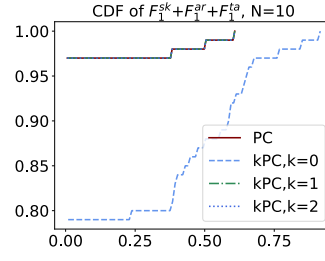(b) Arrowhead + Tail + Skeleton  $F_1$ 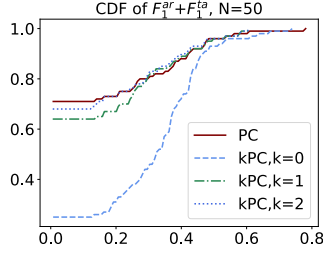(c) Arrowhead + Tail  $F_1$ 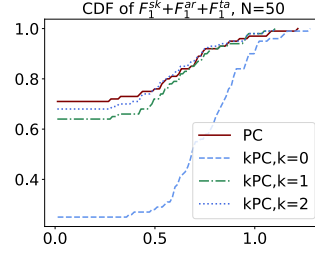(d) Arrowhead + Tail + Skeleton  $F_1$ 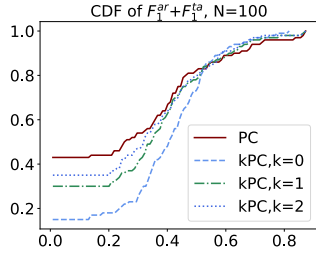(e) Arrowhead + Tail  $F_1$ 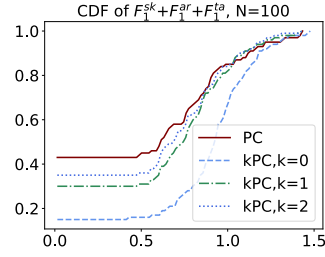(f) Arrowhead + Tail + Skeleton  $F_1$ 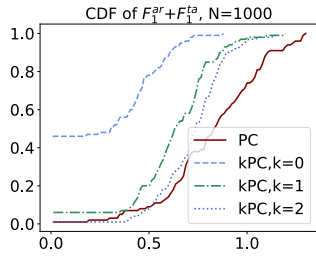(g) Arrowhead + Tail  $F_1$ 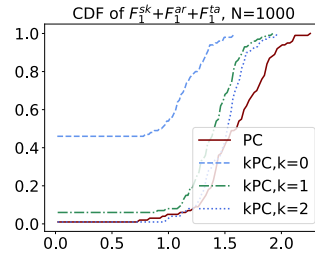(h) Arrowhead + Tail + Skeleton  $F_1$ 

Figure 14: Results of the experiments in Section F.3 in terms of combined scores. For each instance, arrowhead and tail  $F_1$  scores are added before computing CDFs on the left. On the right, arrowhead, tail and skeleton  $F_1$  scores are added together.

We use pcalg package in R as the implementation for conservative PC [13].

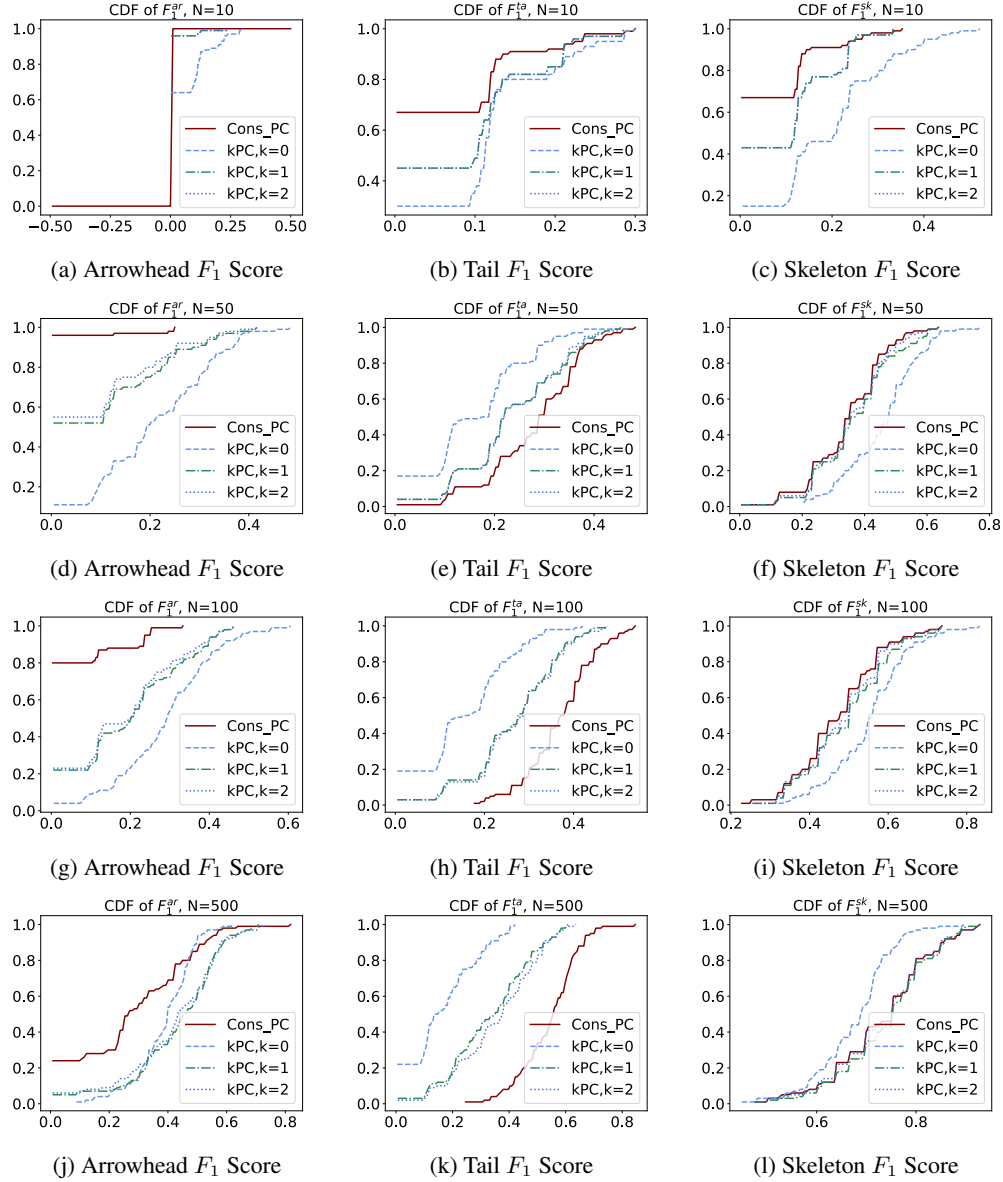

Figure 15: Empirical cumulative distribution function of various  $F_1$  scores on 100 random DAGs on 10 nodes. For each DAG, conditional probability tables are independently and uniformly randomly filled from the corresponding probability simplex. One dataset is sampled per instance. The lower the curve the better. The maximum number of edges is 15.  $k$ -PC maintains an advantage against conservative PC in the arrowhead and skeleton  $F_1$  scores in the low-sample regime.
